# Supplementary material for: Evaluation of electrostatic sprayers and foggers for the application of disinfectants in the era of SARS-CoV-2
Source: PubMed Central journal article supplement (PMC8483385; doi:10.1371/journal.pone.0257434), 2021-09-30

# Cumulative size distributions of sprayers and foggers

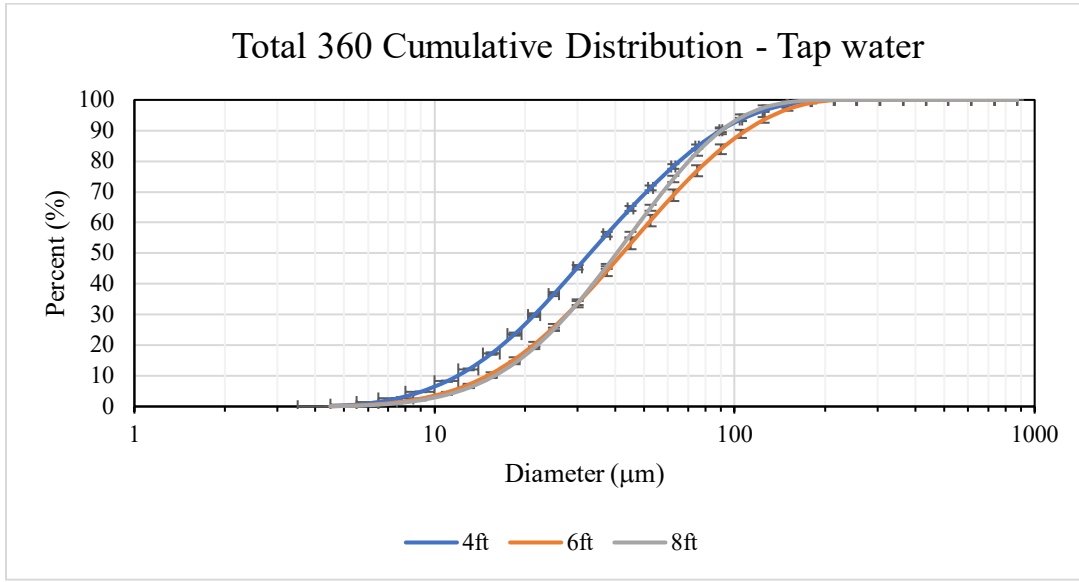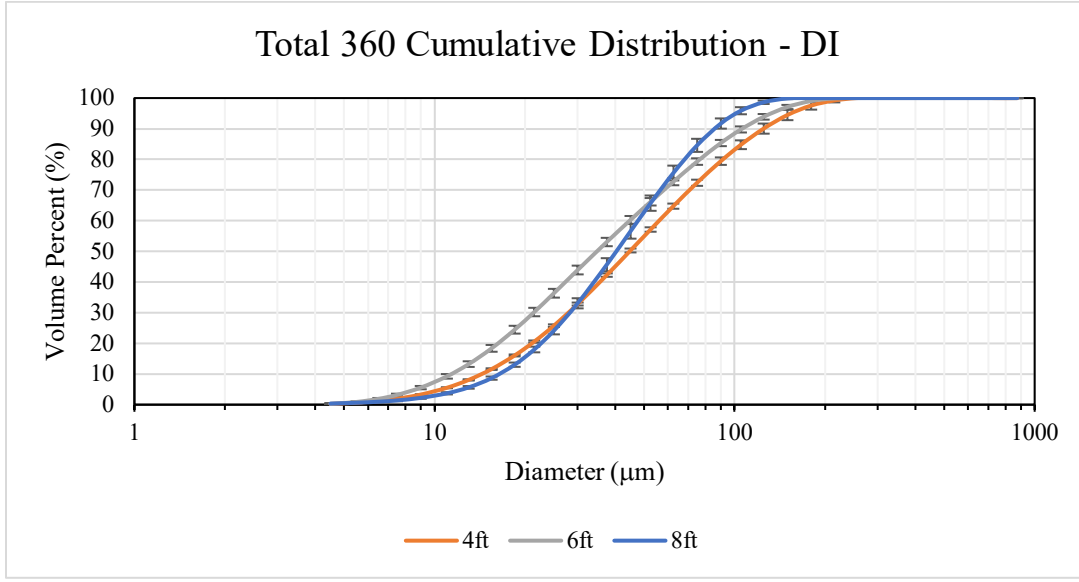

### Airofog Cumulative Distribution Tap

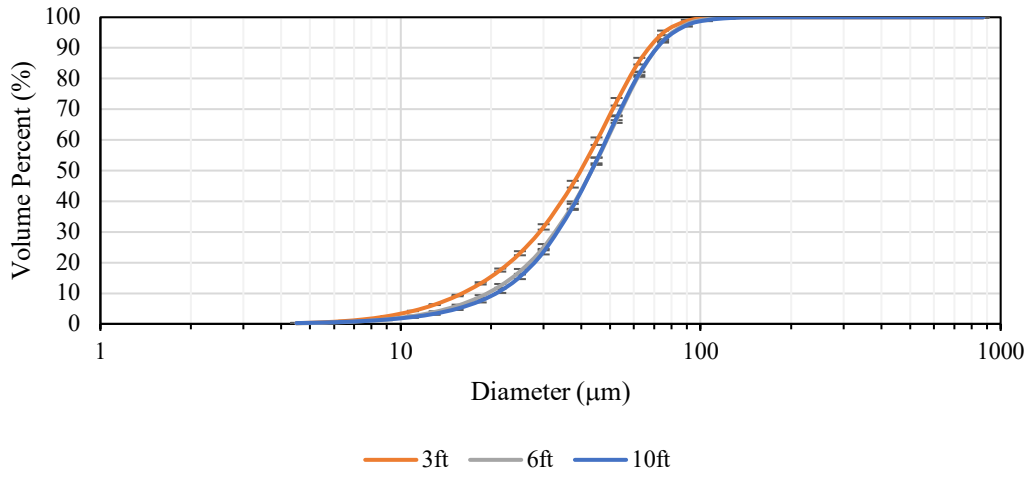

### Airofog Cumulative Distribution DI

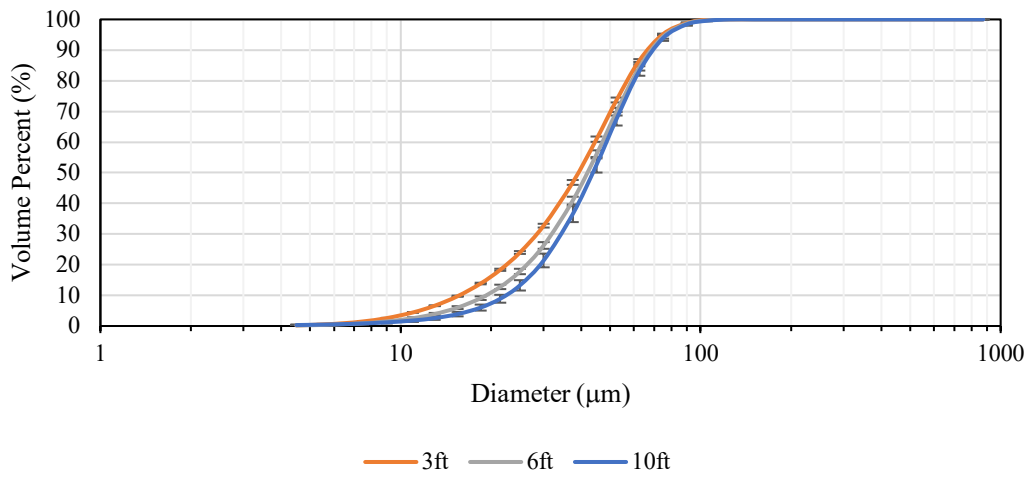

PX 300 Red nozzle Cumulative Distribution Tap

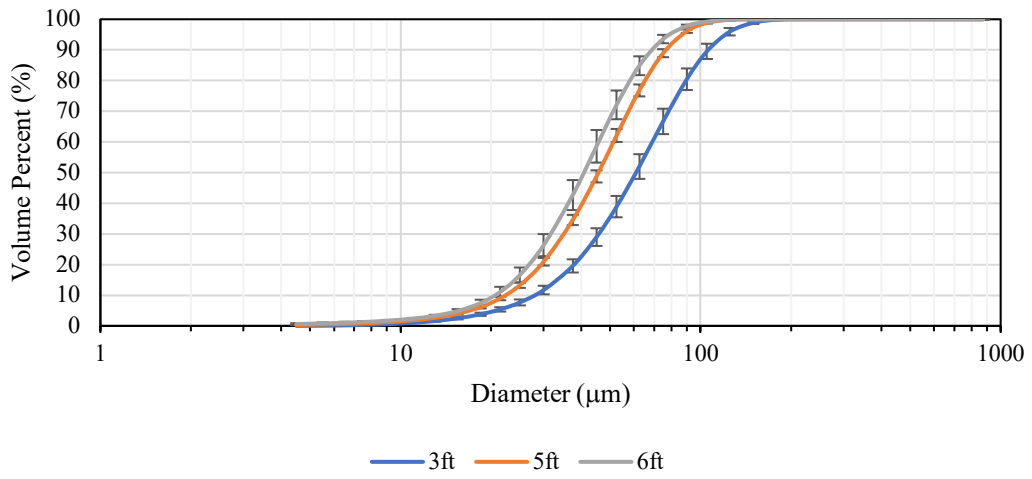

PX300 Red nozzle Cumulative Distribution DI

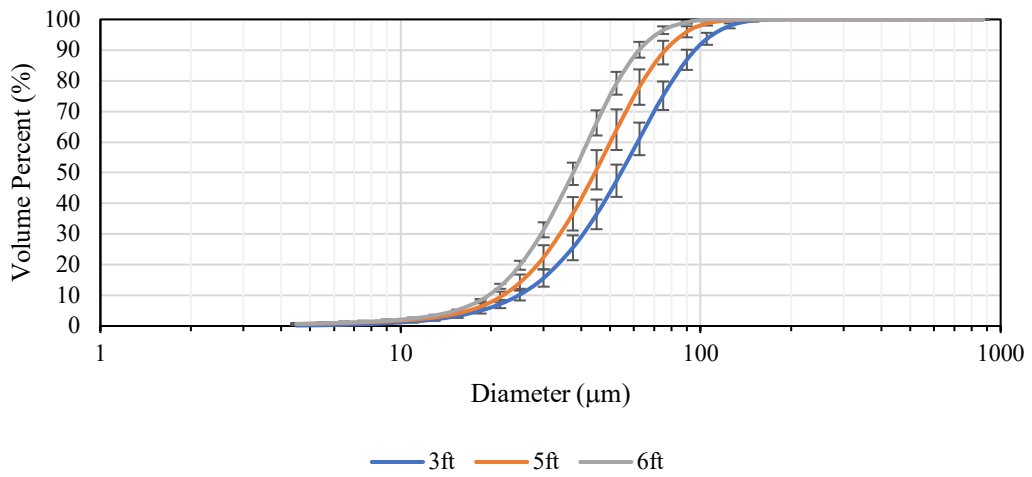

PX 300 green nozzle Cumulative Distribution Tap

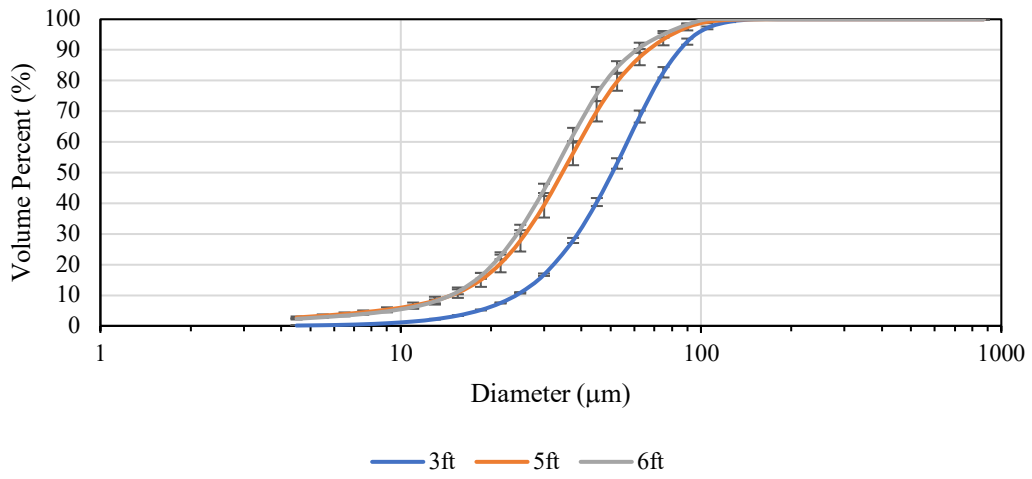

PX300 green nozzle Cumulative Distribution DI

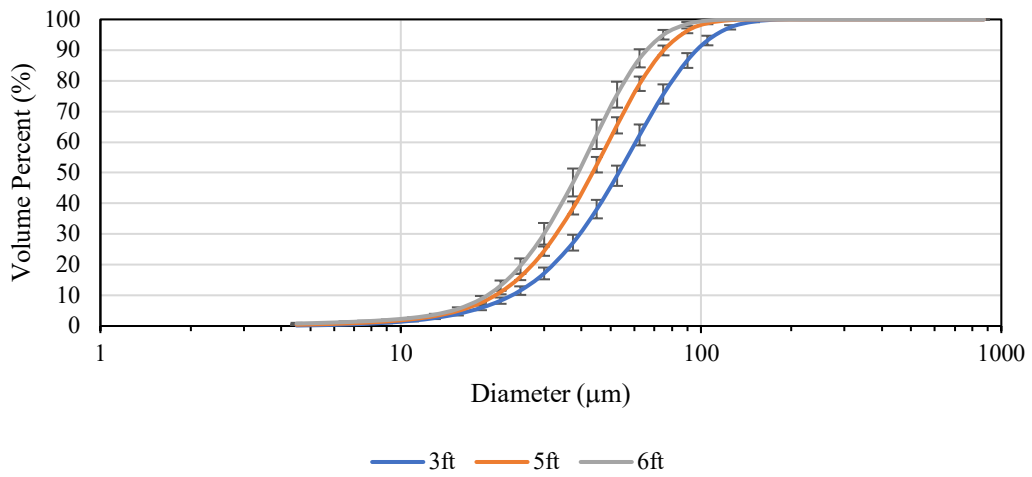

PX200 HH ES On Cumulative Distribution Tap

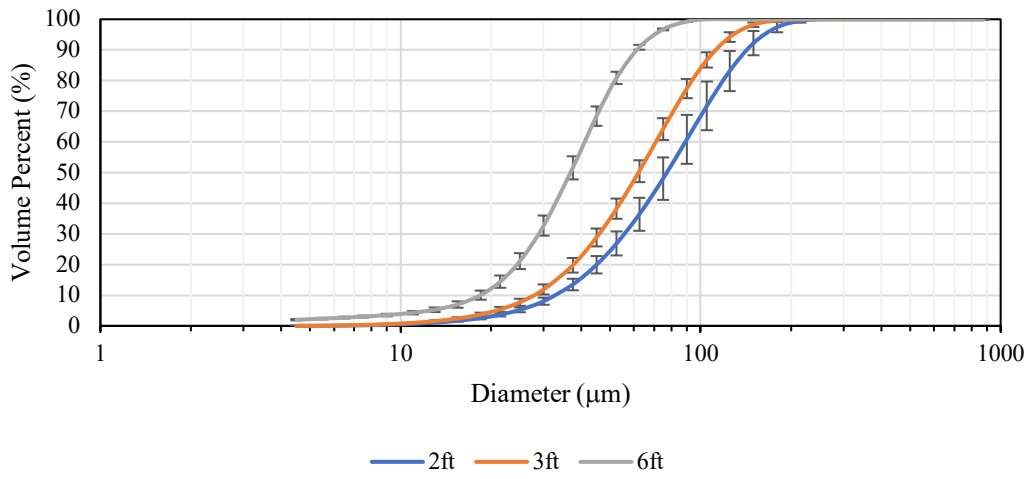

PX200 HH ES On Cumulative Distribution DI

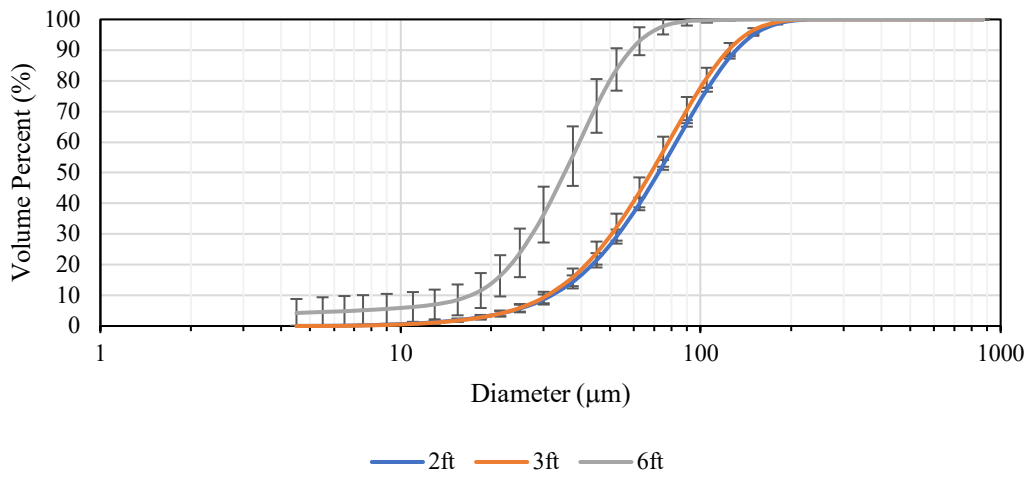

PX200 HH ES Off Cumulative Distribution Tap

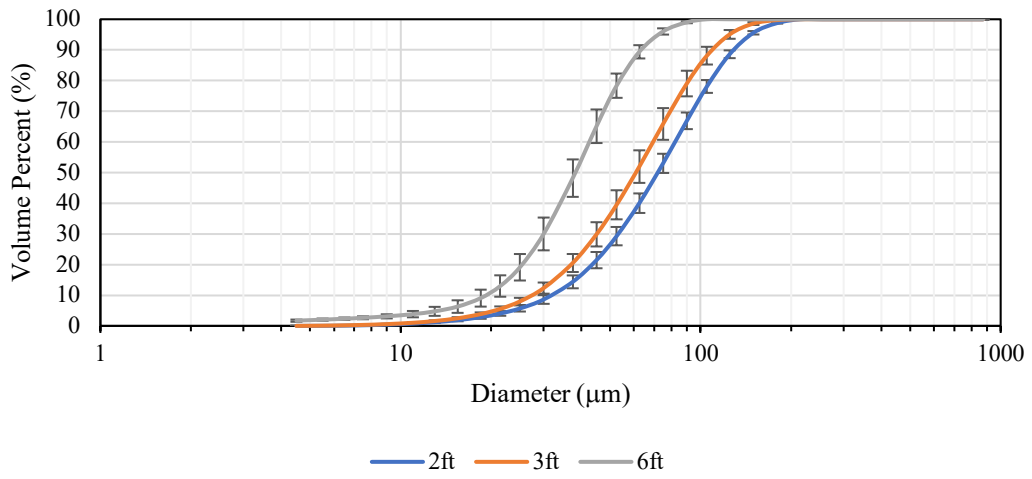

PX200 HH ES Off Cumulative Distribution DI

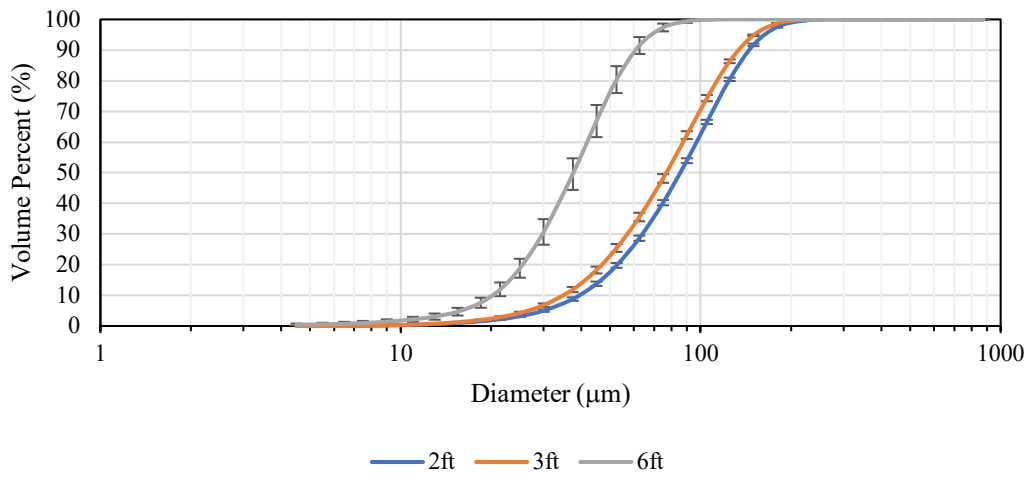

### R40 Cumulative Distribution Tap

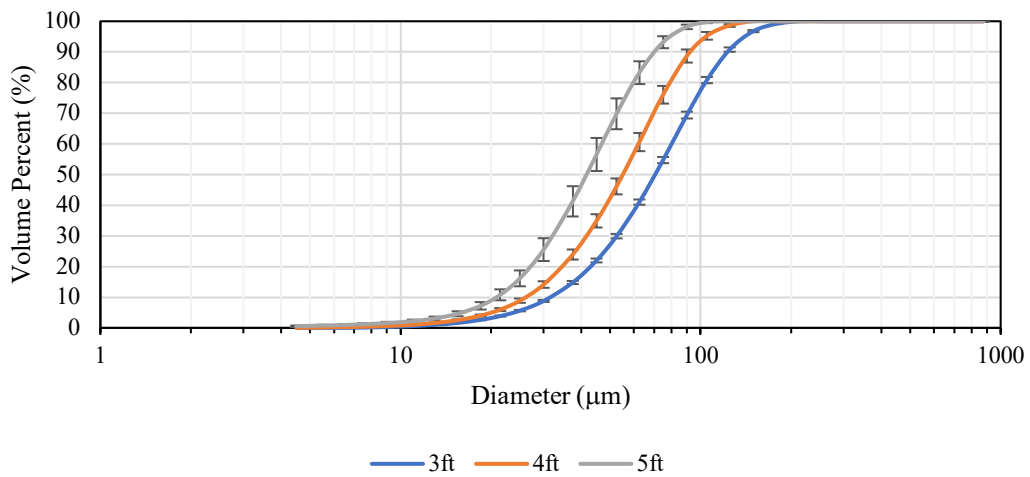

### R40 Cumulative Distribution DI

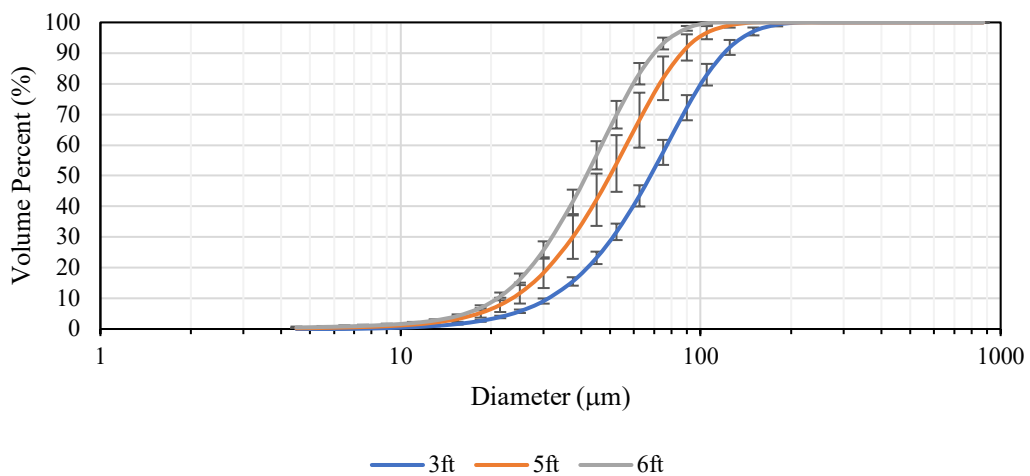

### EM360 Cumulative Distribution Tap

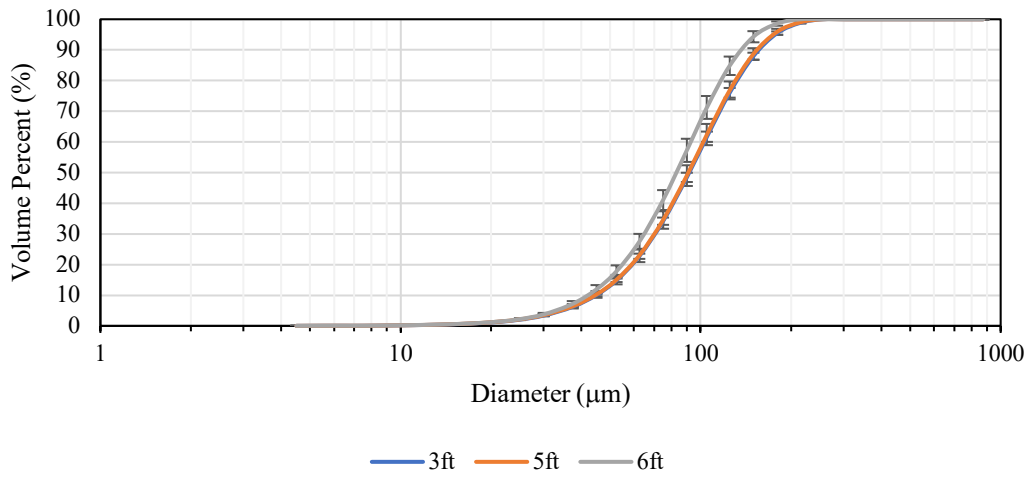

### EM360 Cumulative Distribution DI

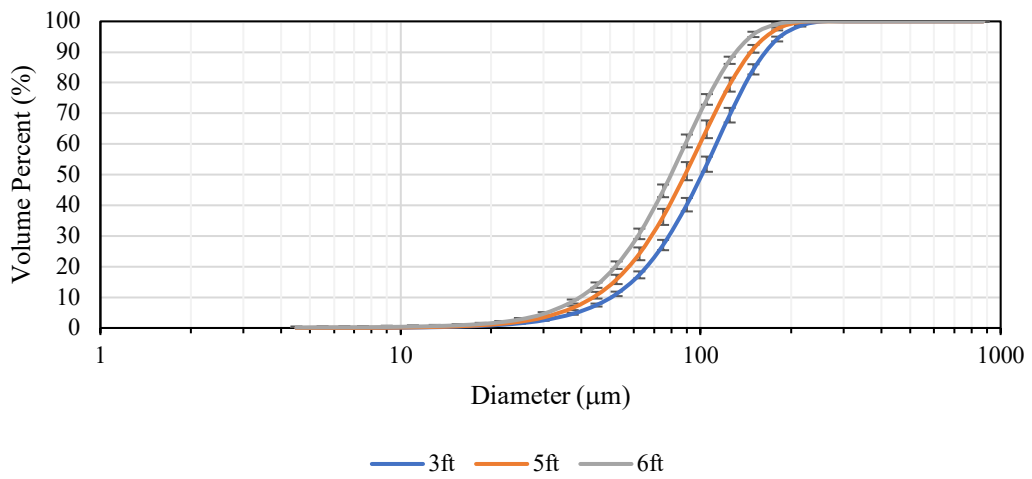



### Garden sprayer Cumulative Distribution Tap

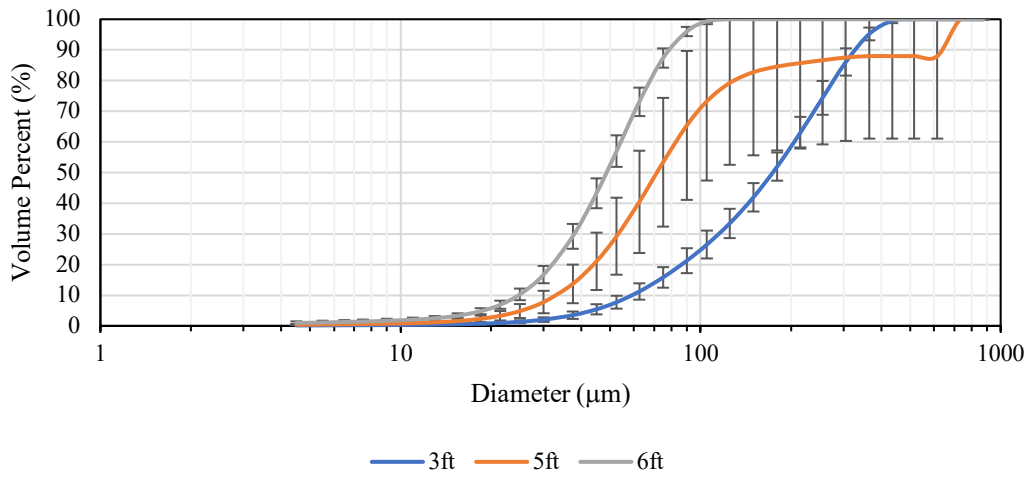

### Garden sprayer Cumulative Distribution DI

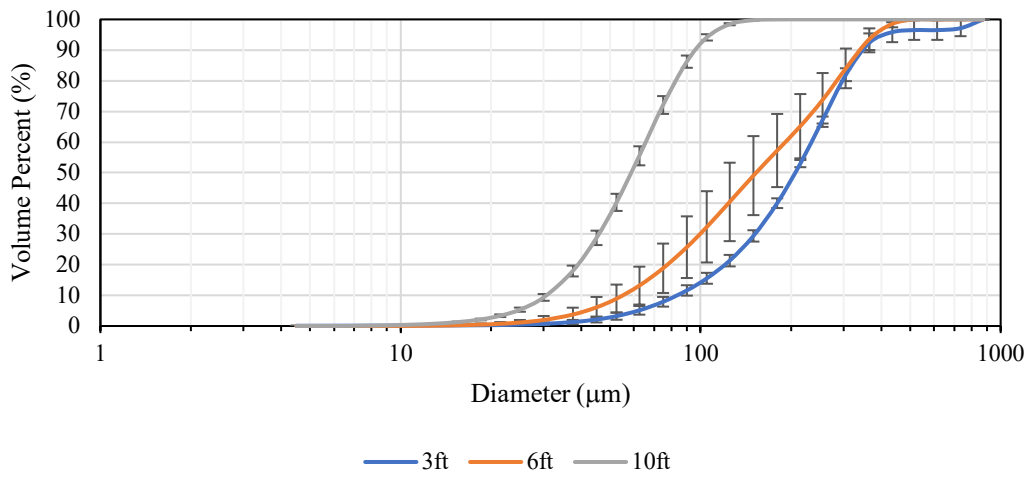

Note cumulative size distribution data not available for the KB-15002E for tap water

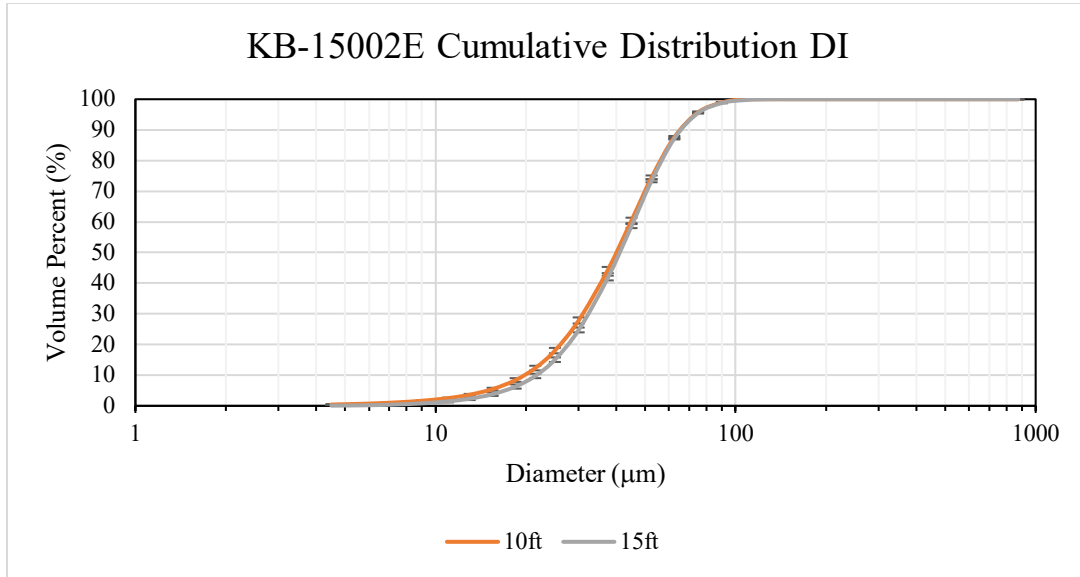

### SC-ET Cumulative Distribution Tap

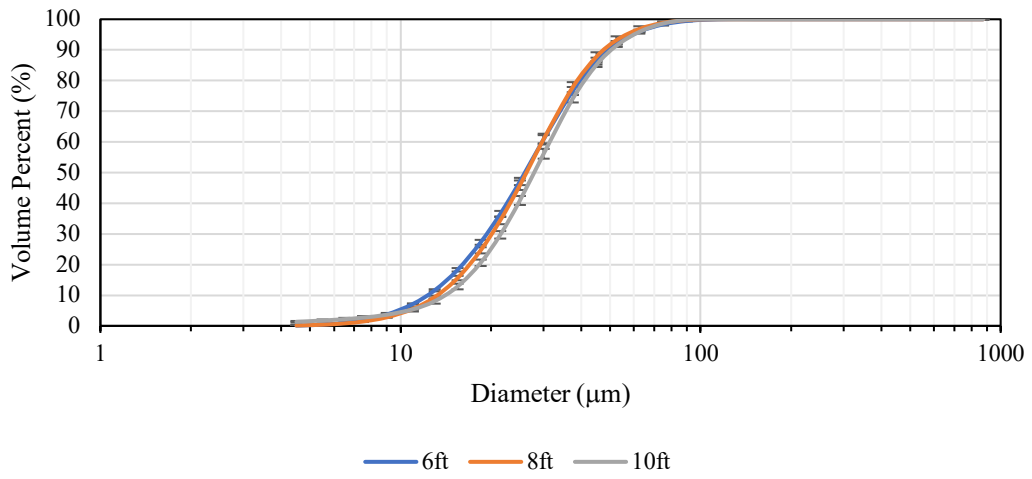

### SC-ET Cumulative Distribution DI

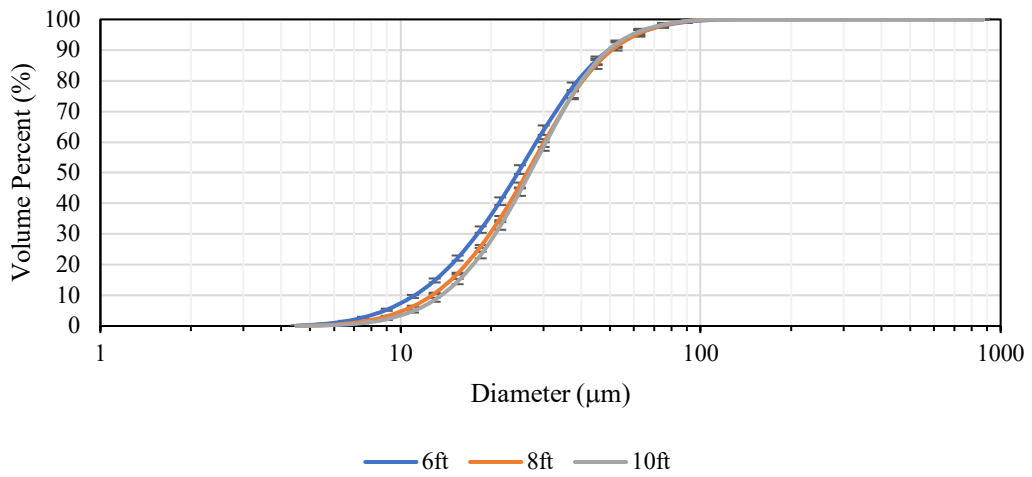

### Total 360 4ft Distance Summary

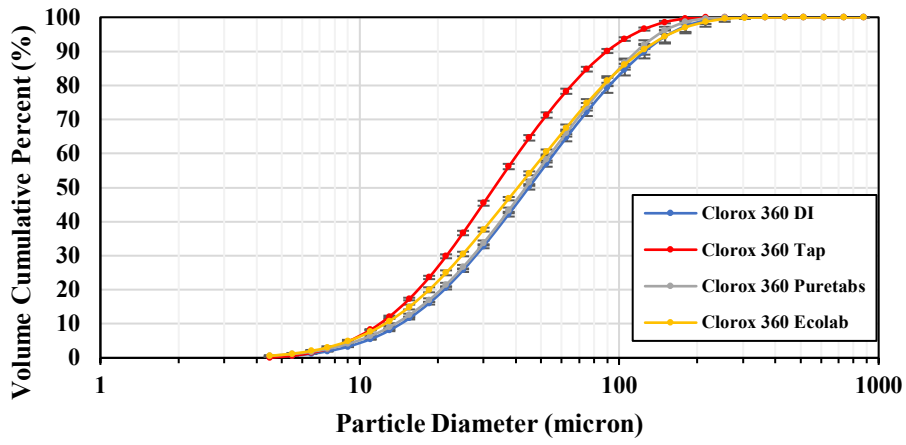

### Total 360 6ft Distance Summary

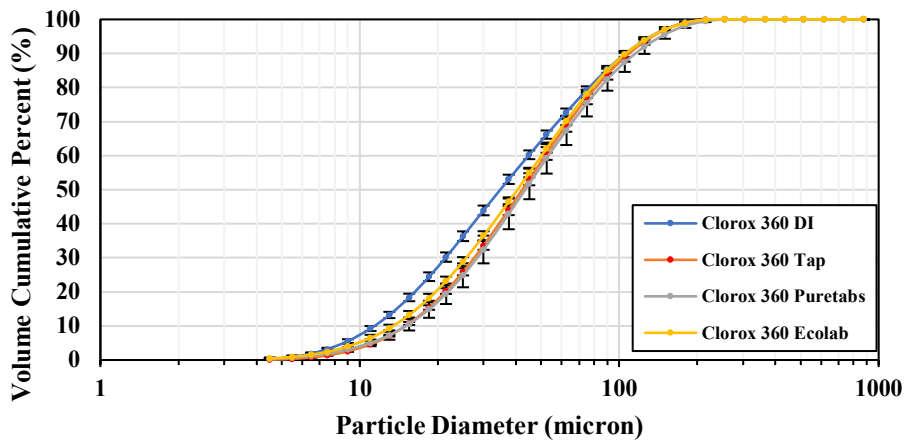

### Total 360 8ft Distance Summary

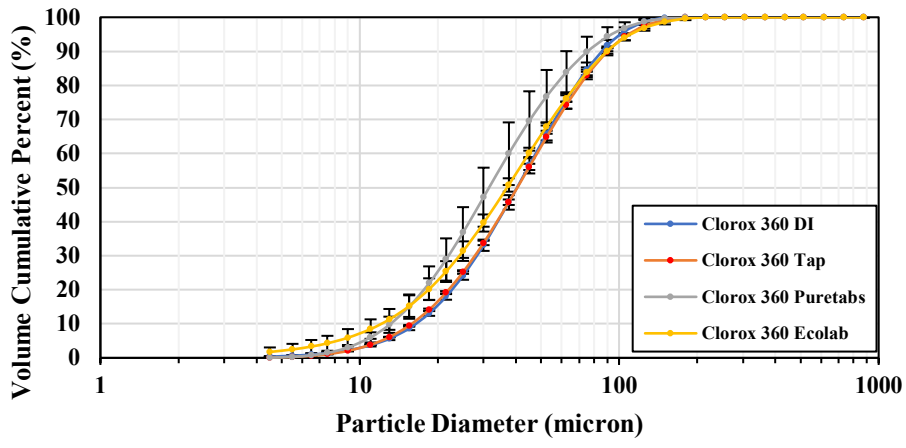

Supplement: pone.0257434.s001.pdf [file pone.0257434.s001.pdf]
