# Supplementary material for: Evaluation of electrostatic sprayers and foggers for the application of disinfectants in the era of SARS-CoV-2
Source: PubMed Central journal article supplement (PMC8483385; doi:10.1371/journal.pone.0257434), 2021-09-30
Supplement: pone.0257434.s002.pdf [file pone.0257434.s002.pdf]

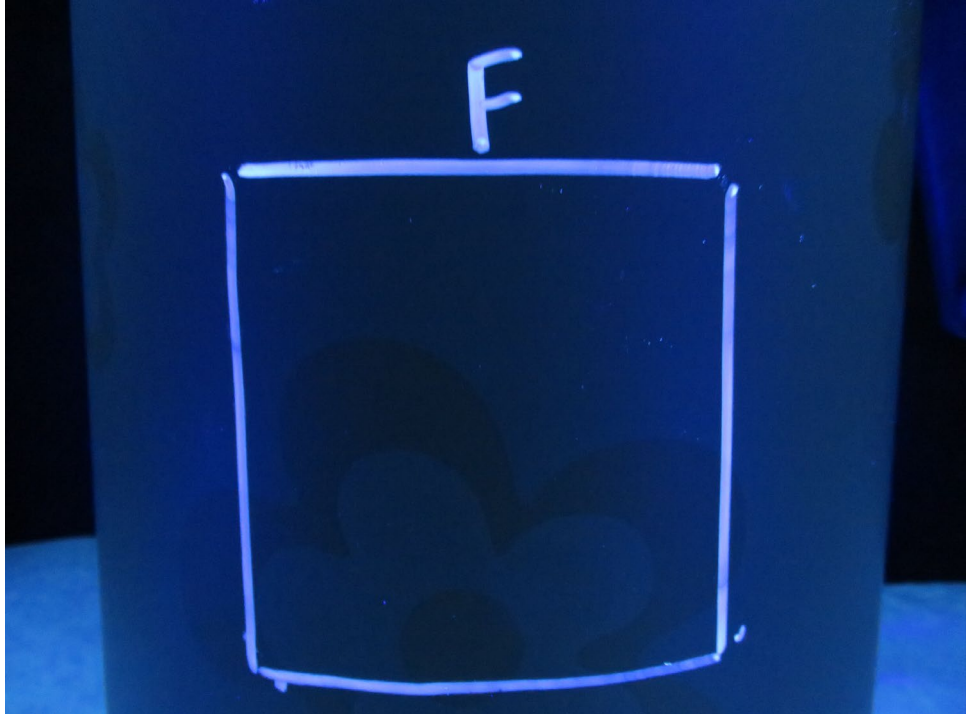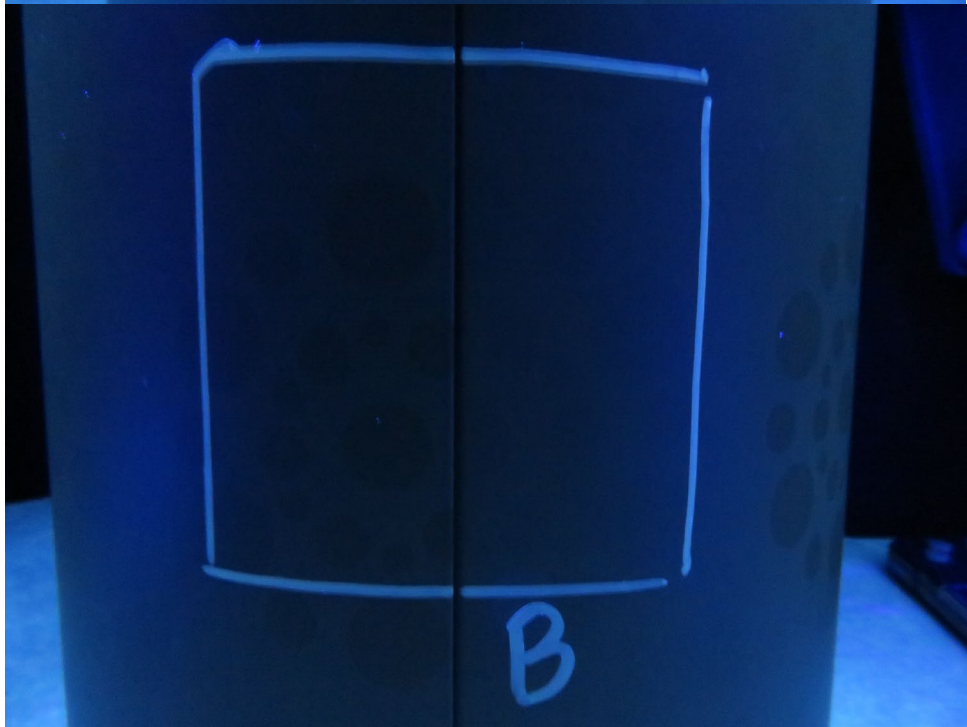

blanks

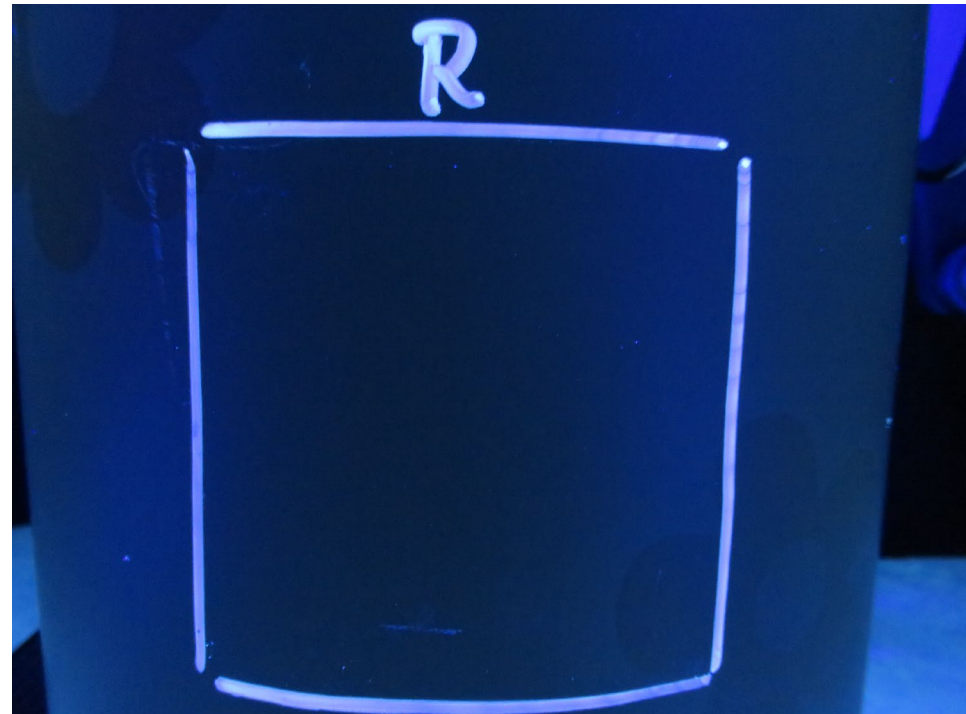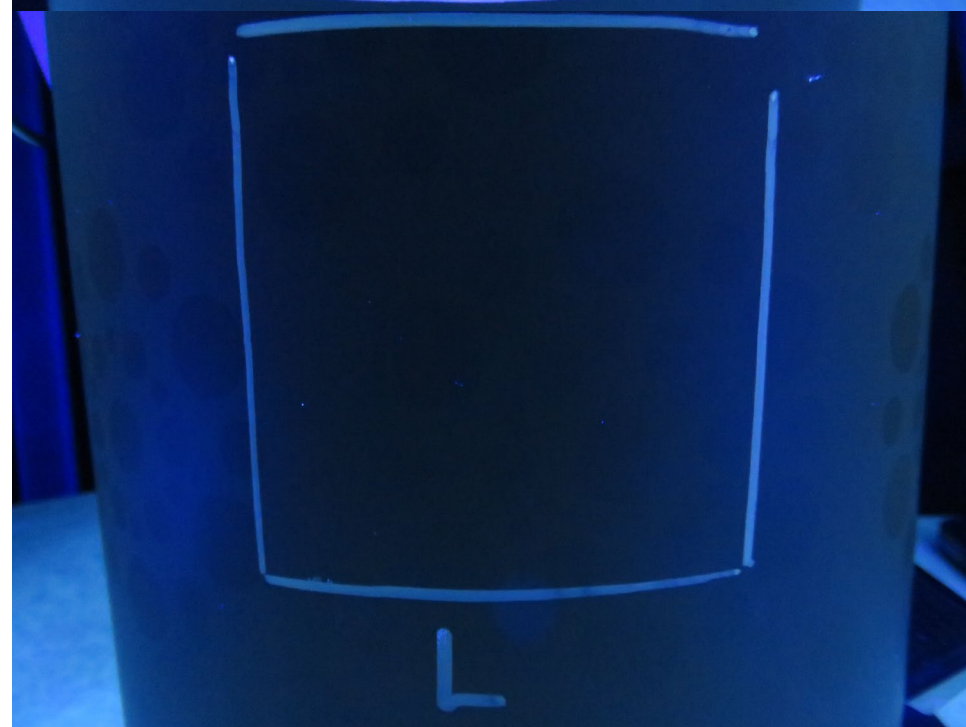

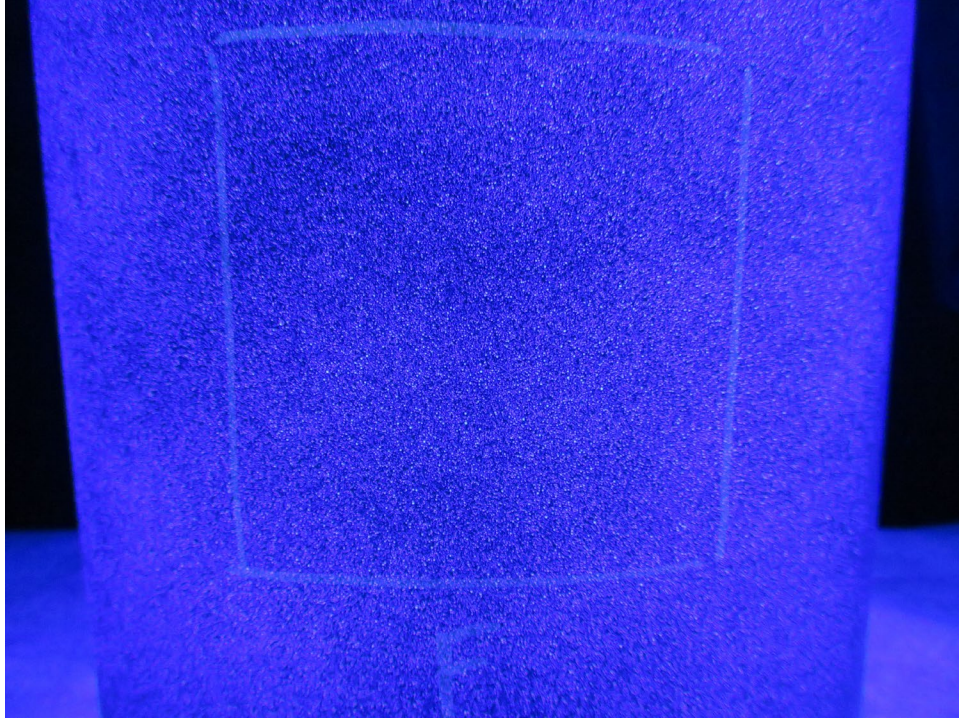

PX300 red nozzle

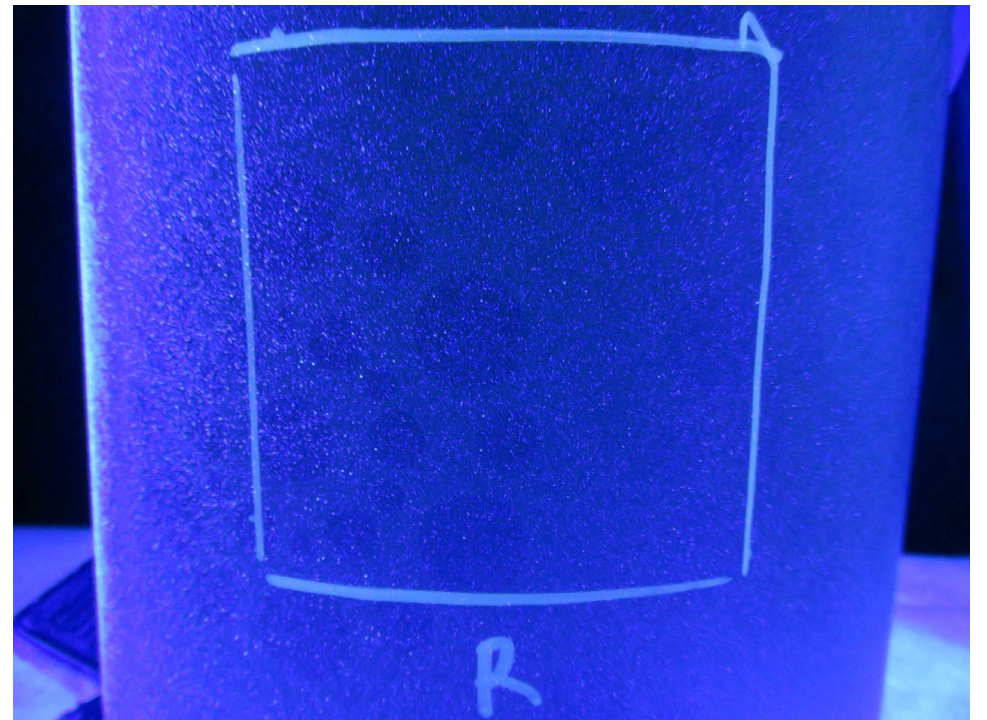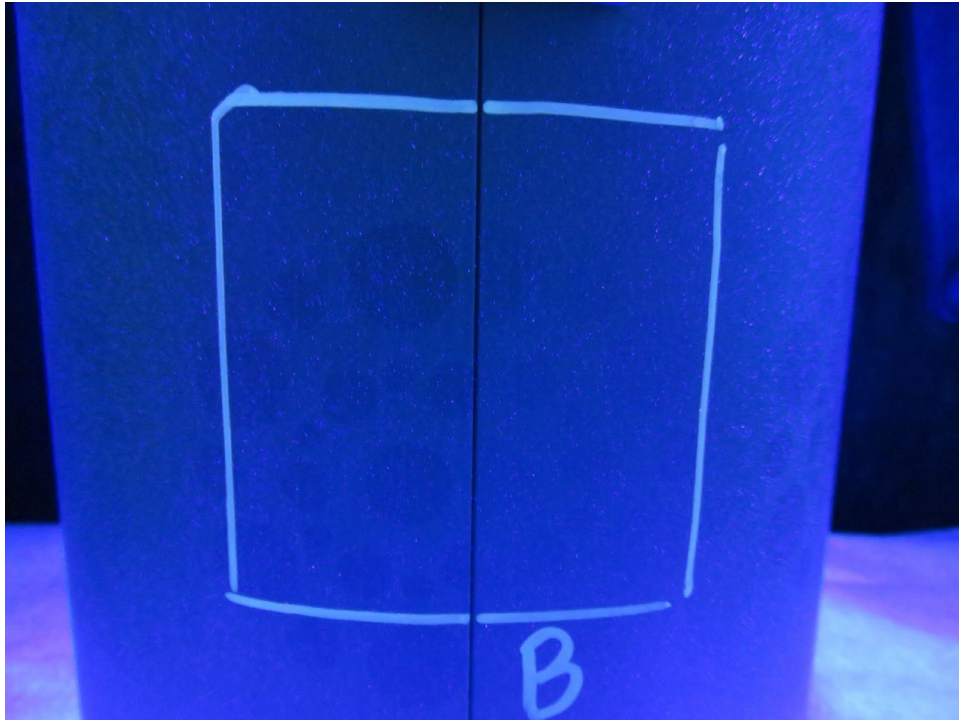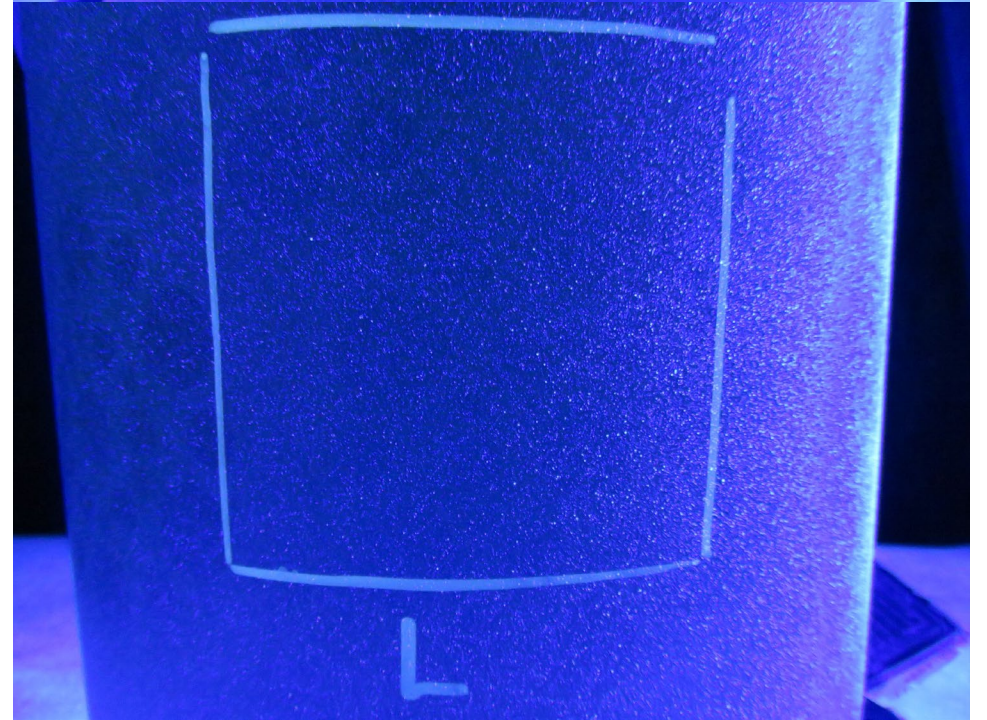

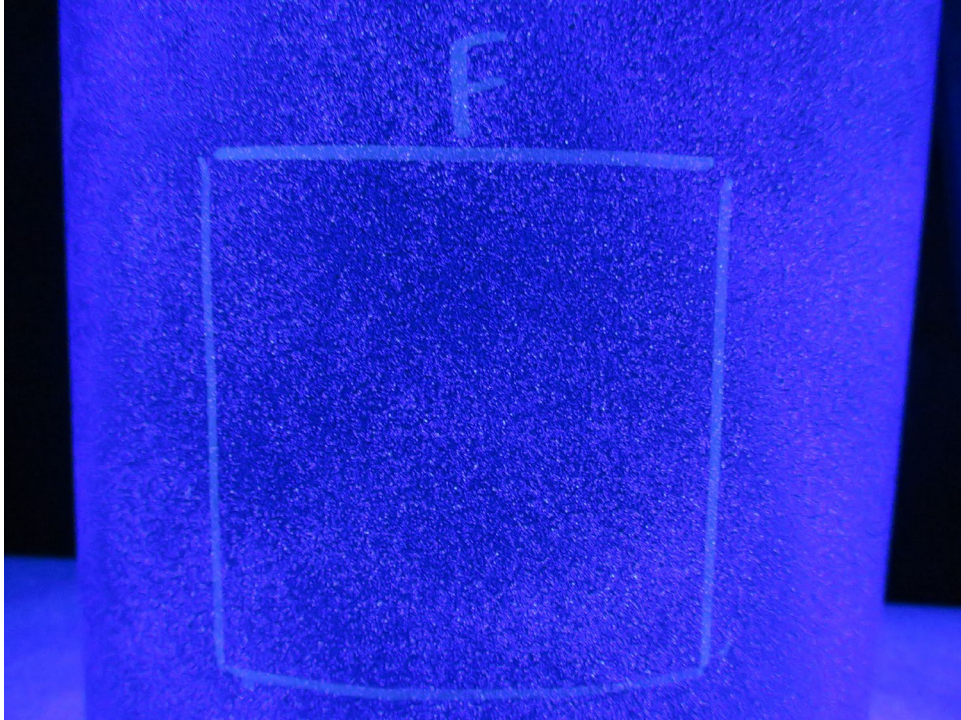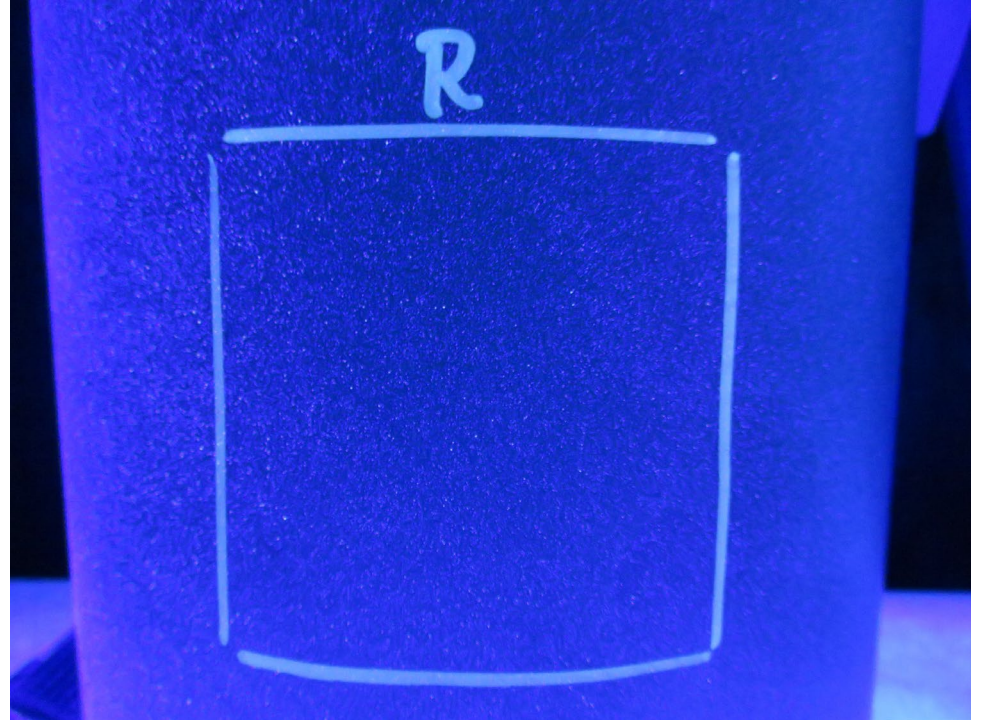

Px300 green

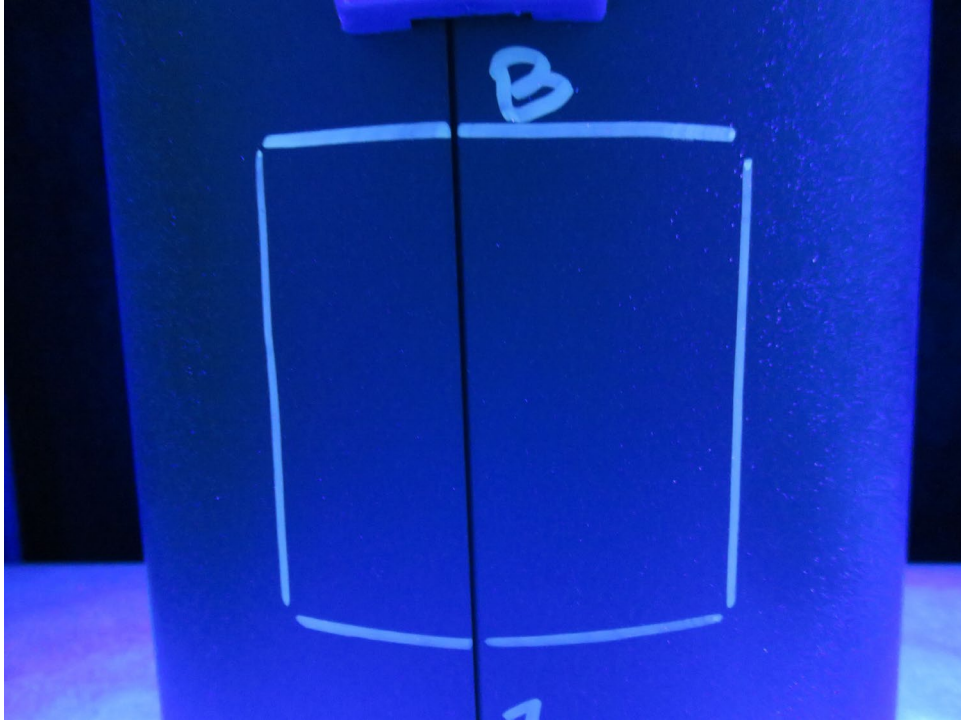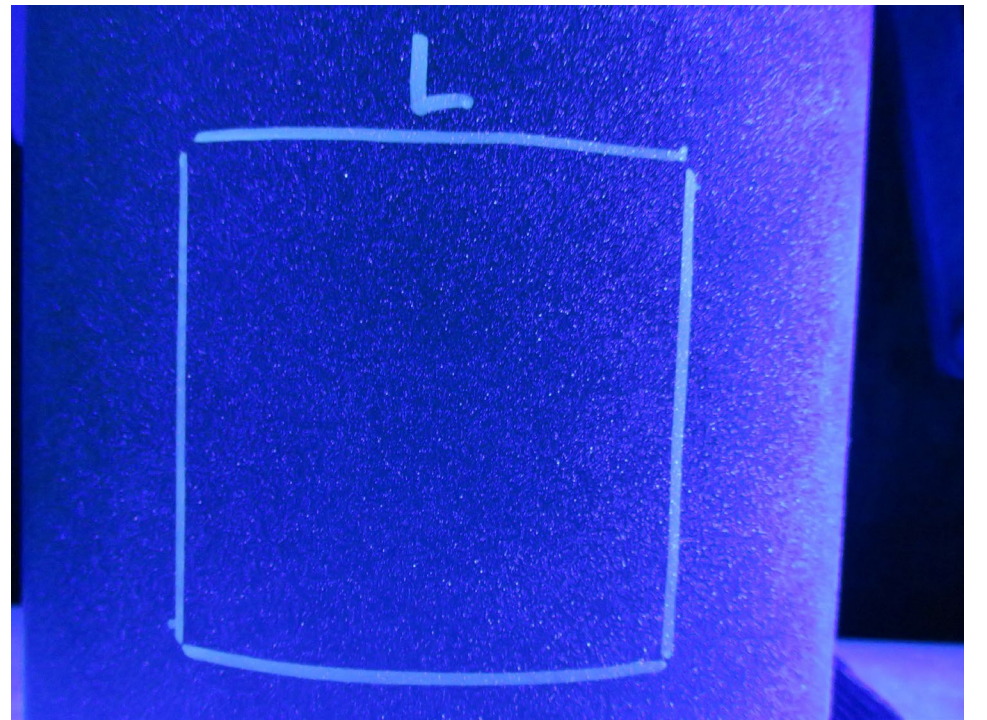

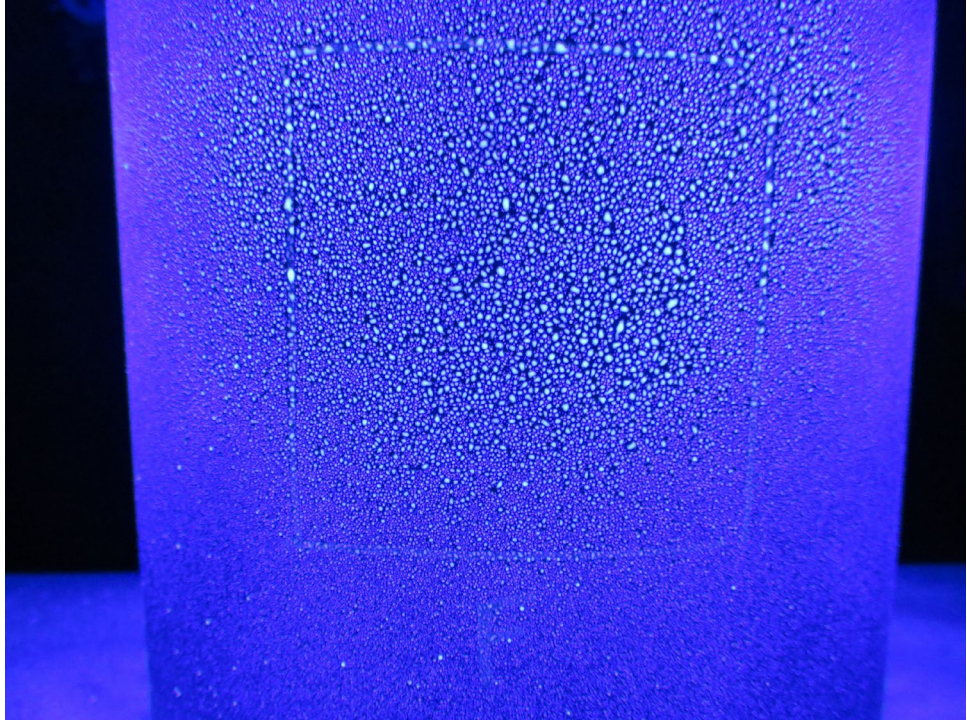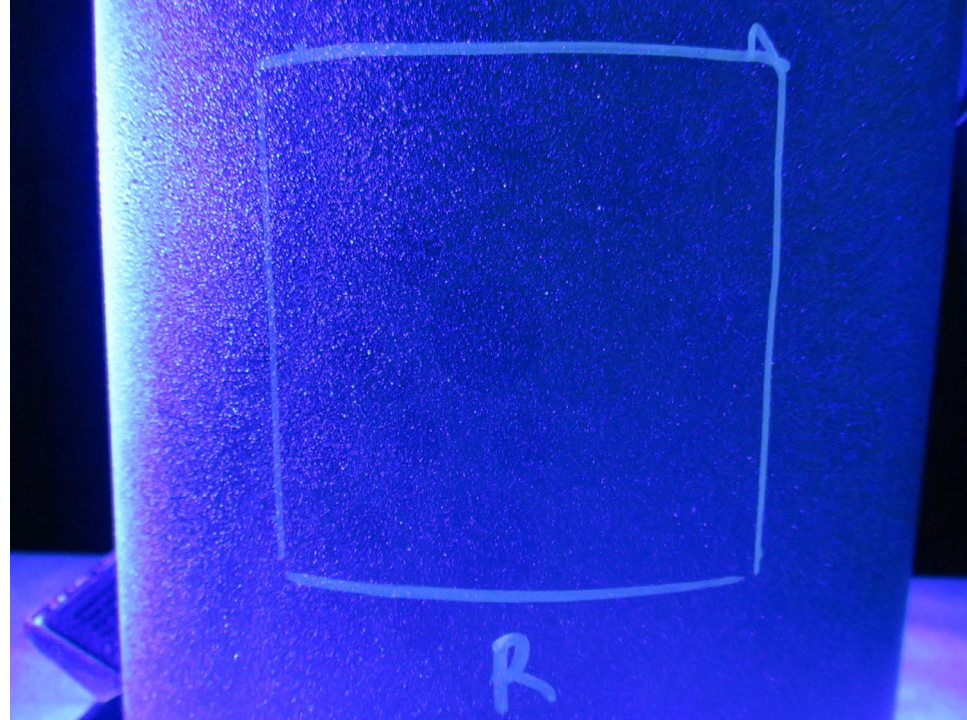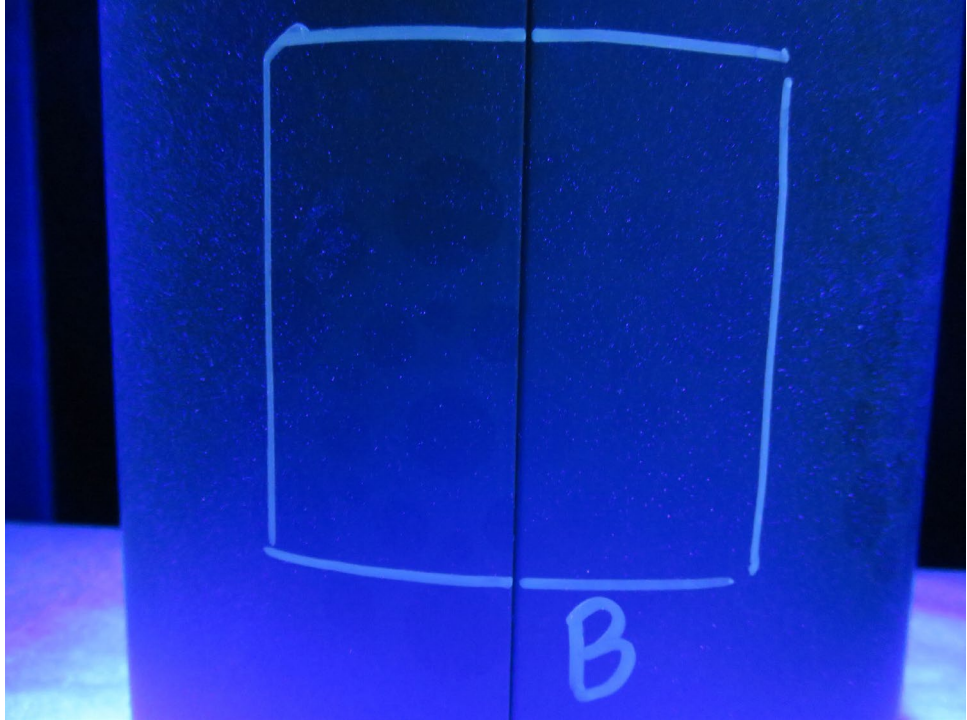

Px200 on

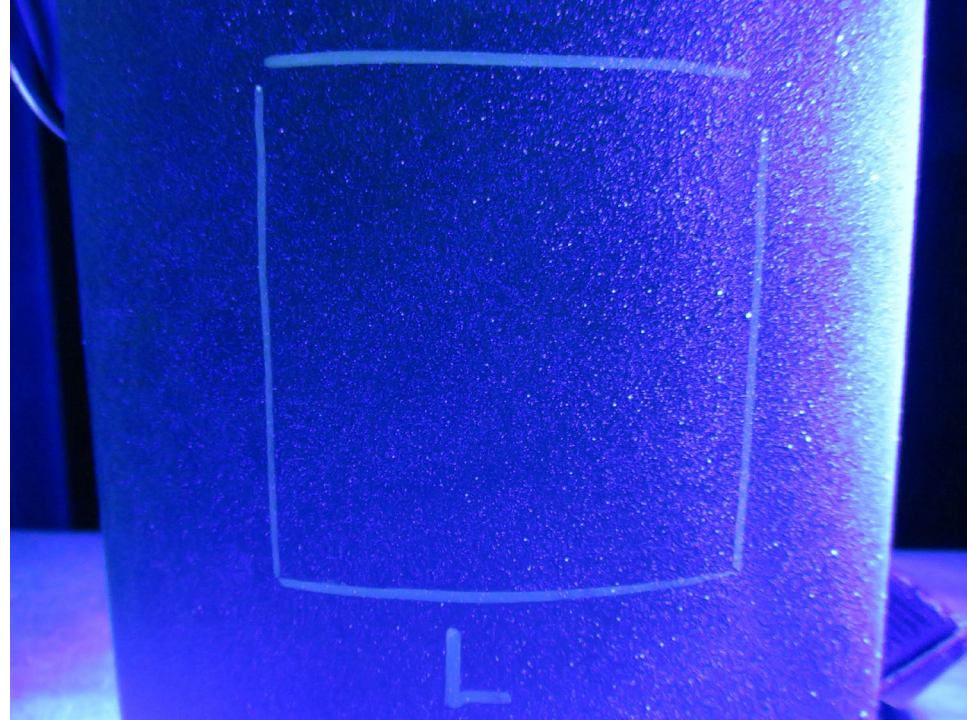

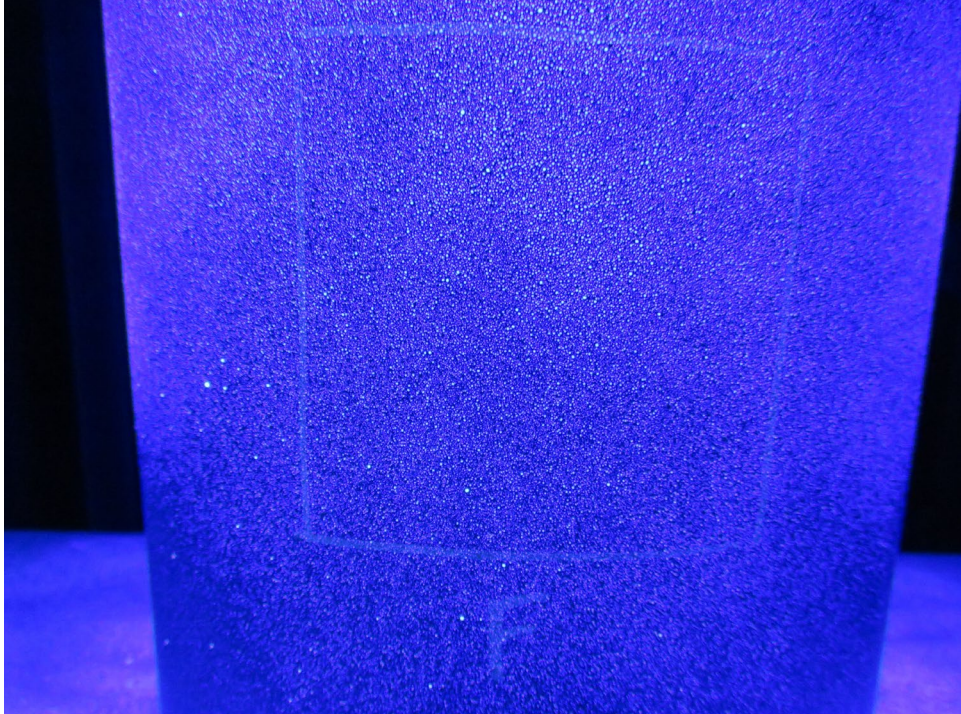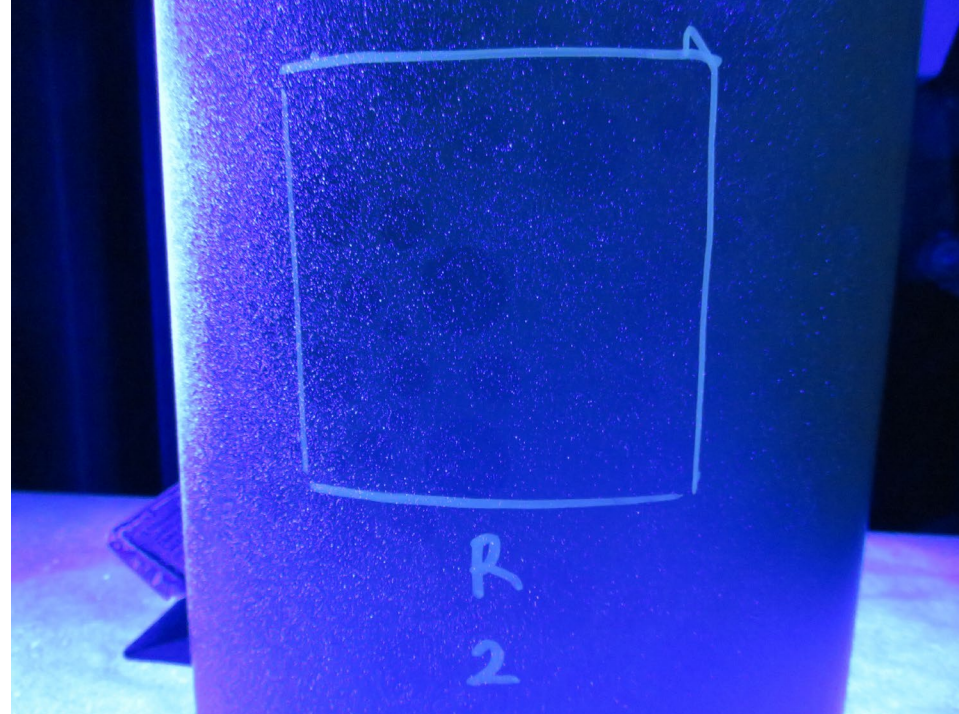

Px200 off

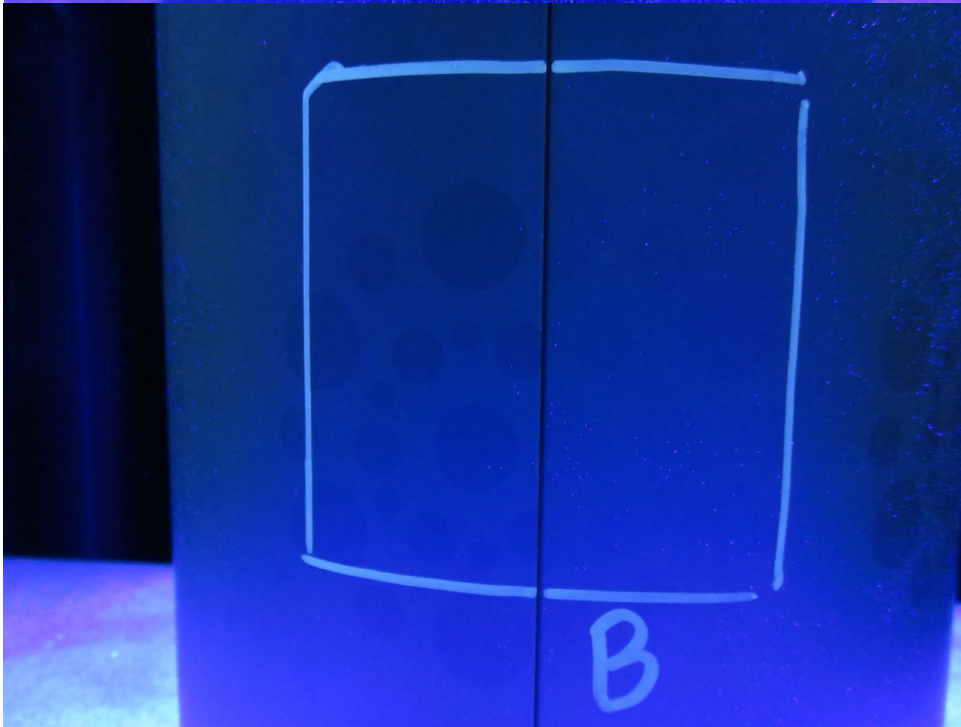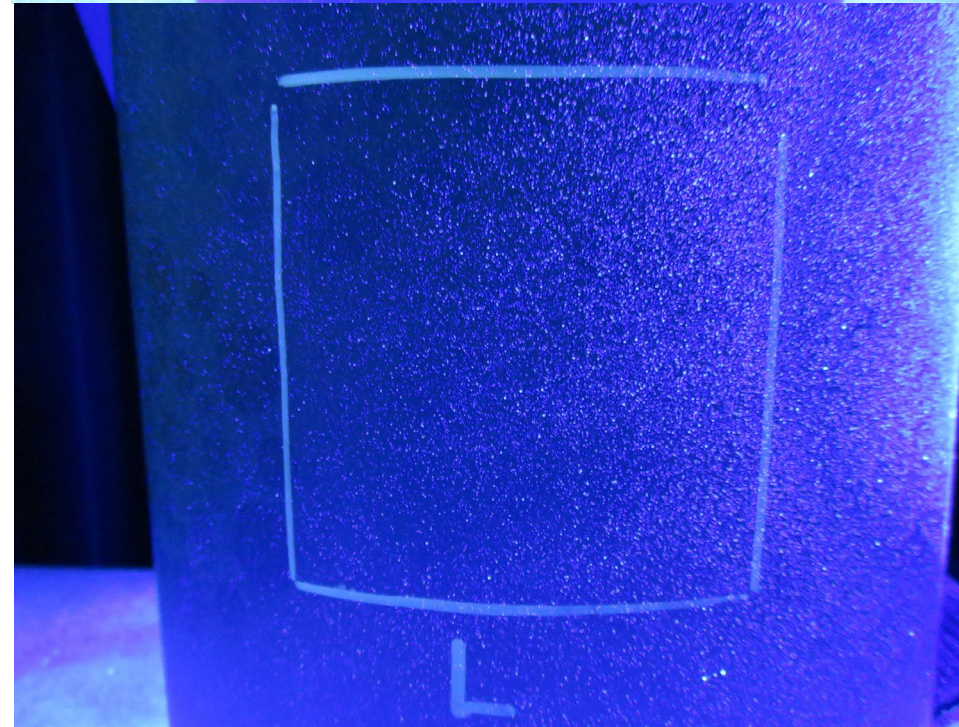

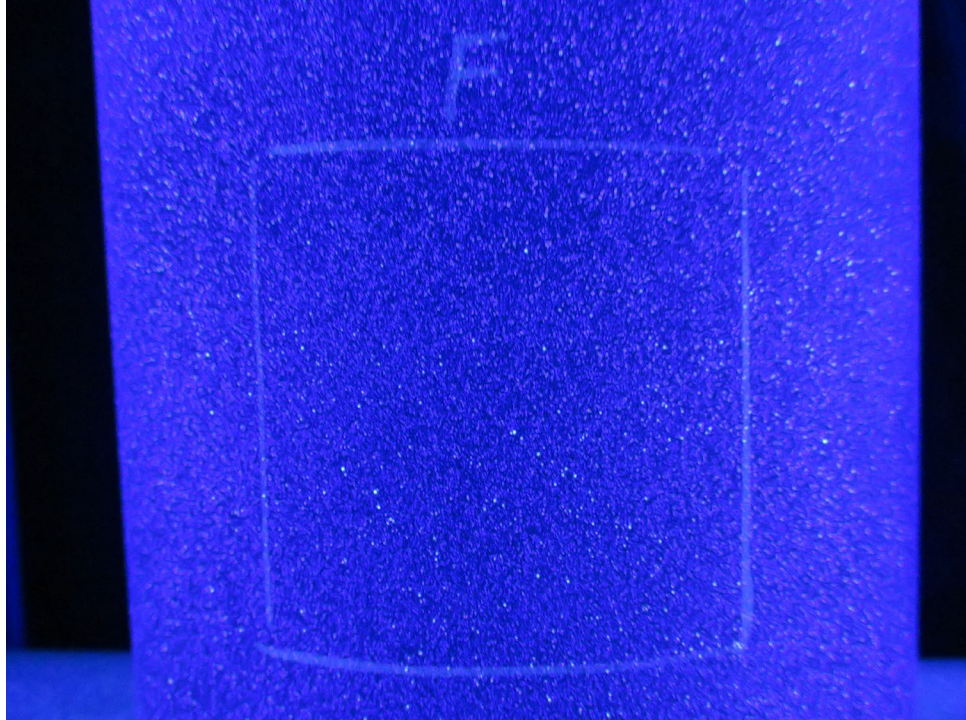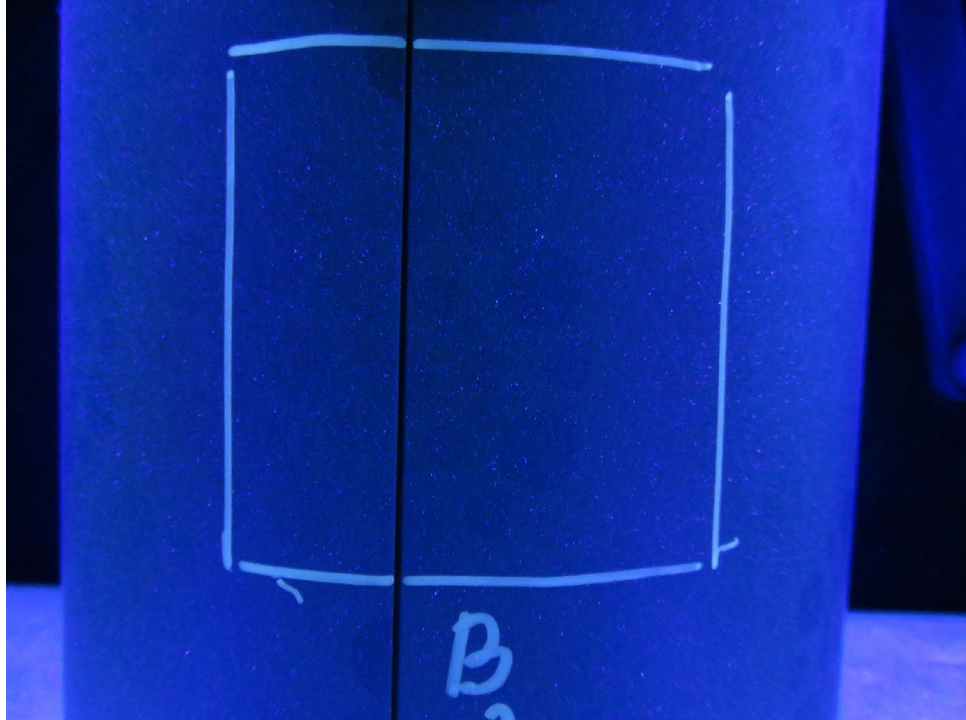

Clorox 360 tap

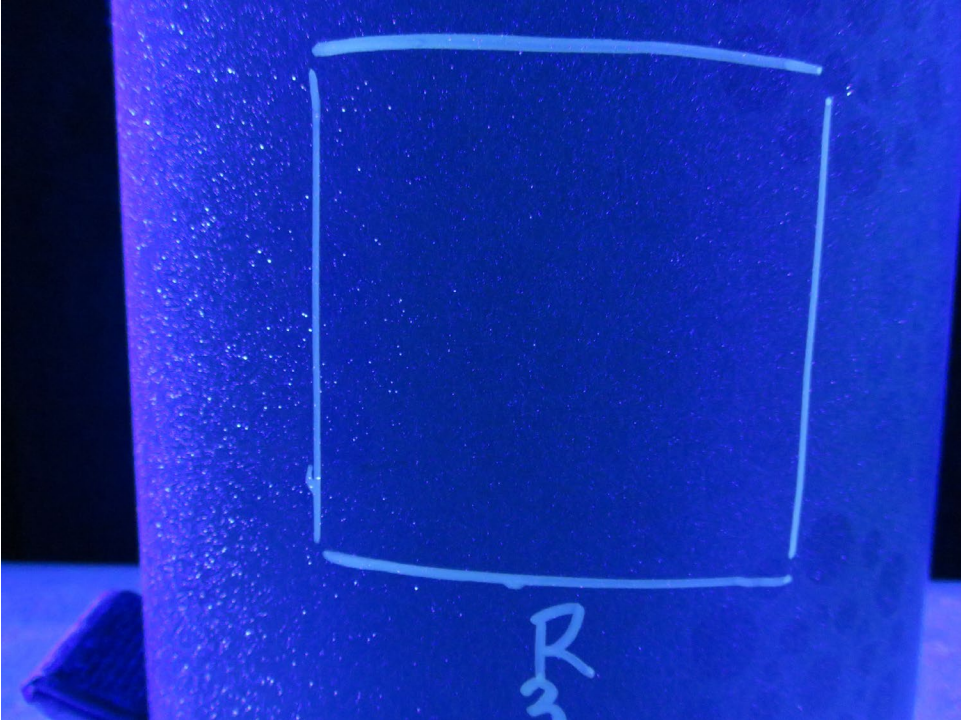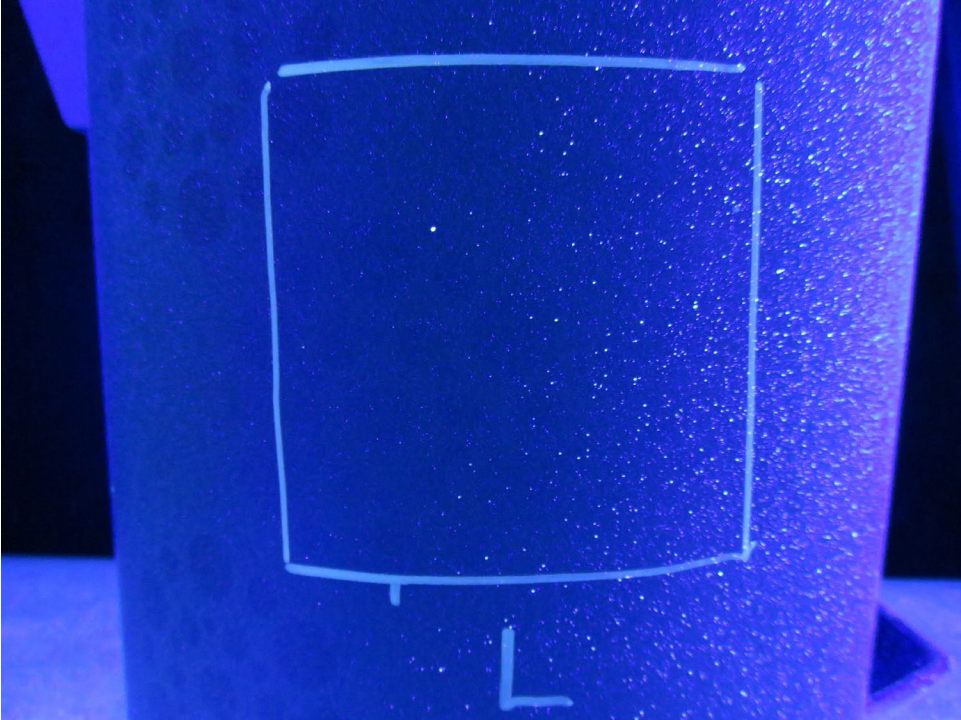

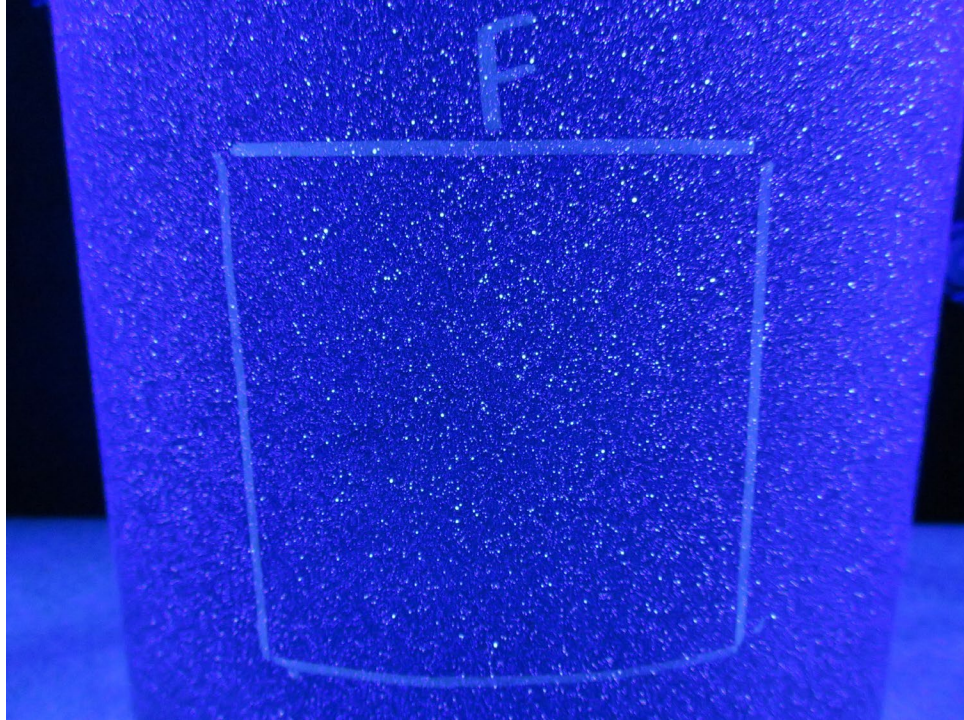

Clorox 360 DI

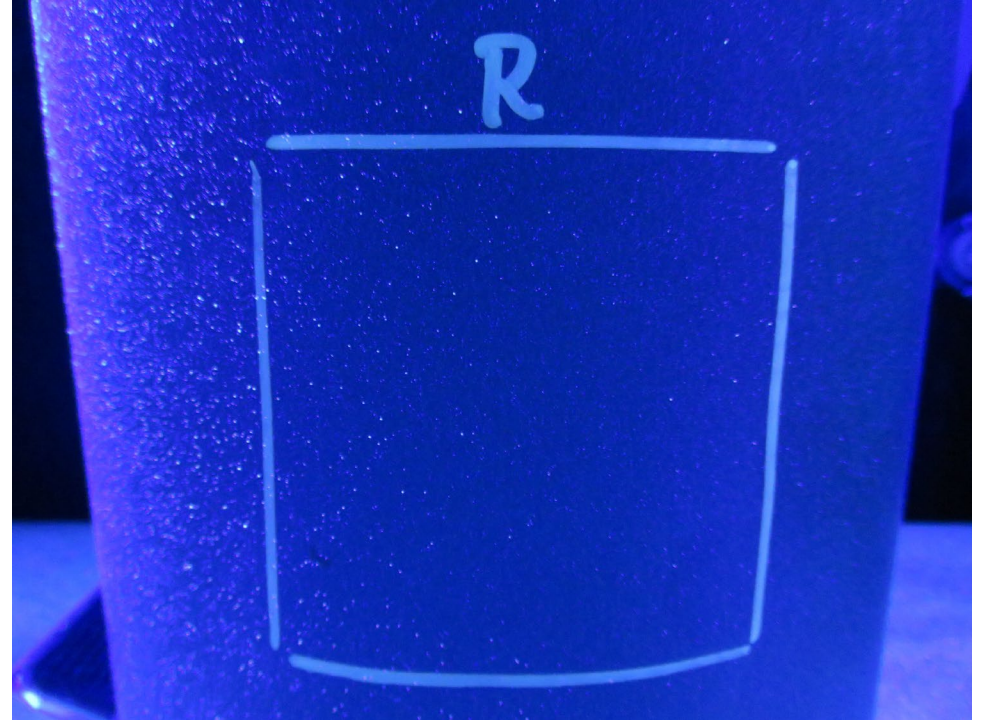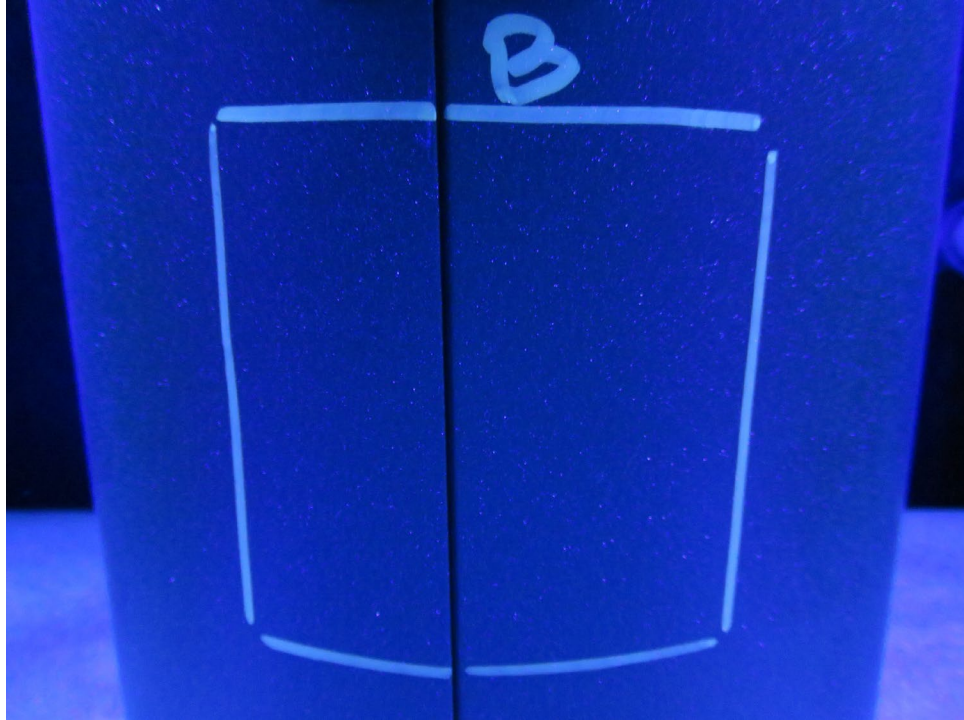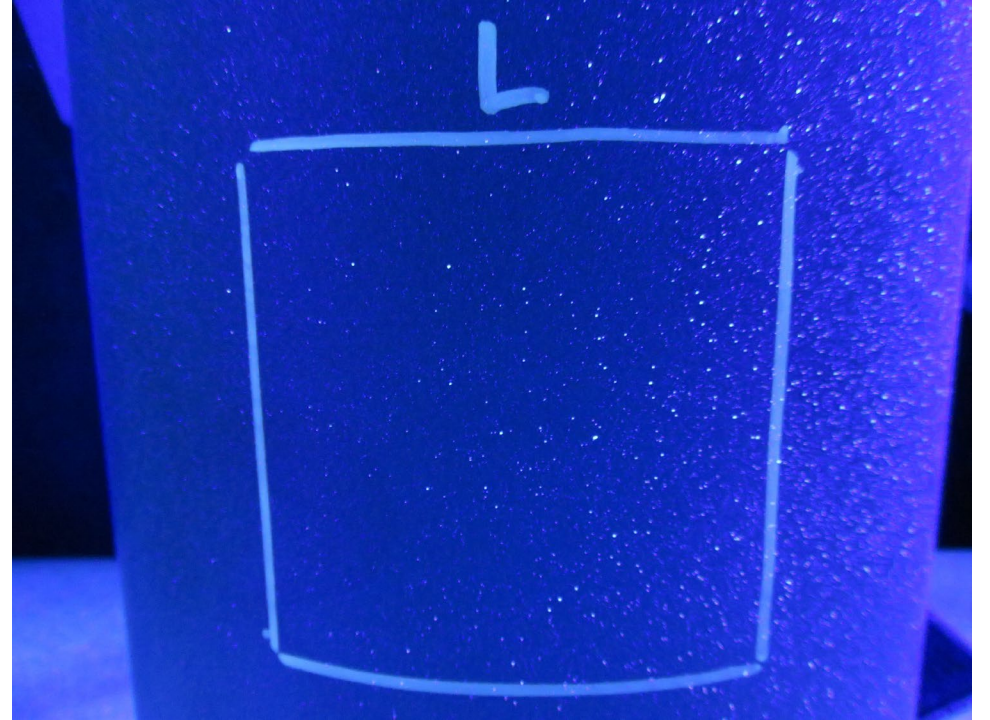

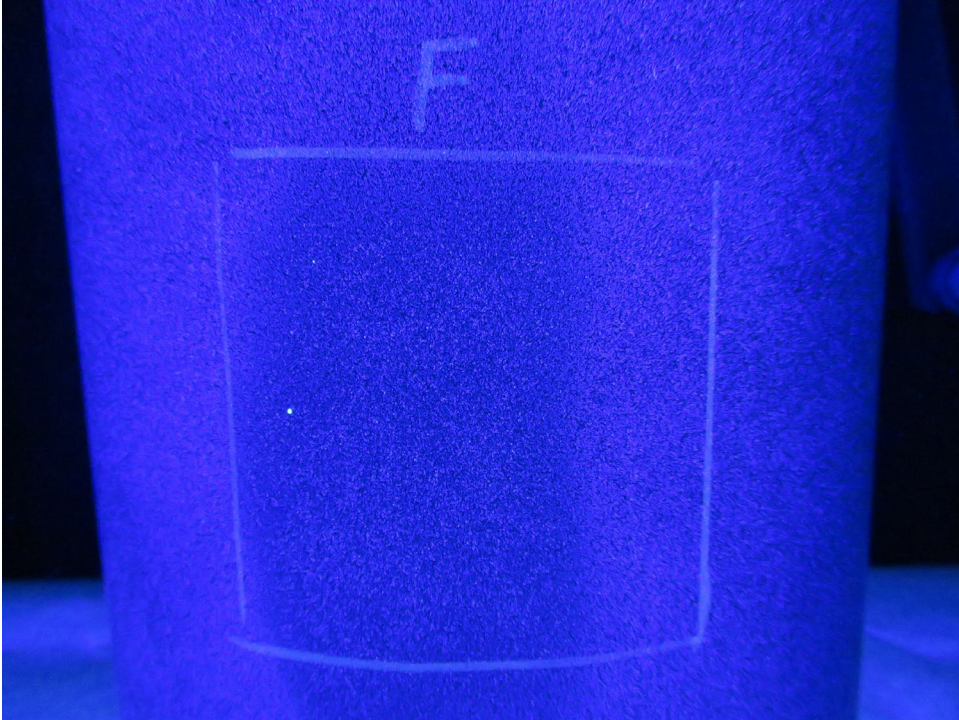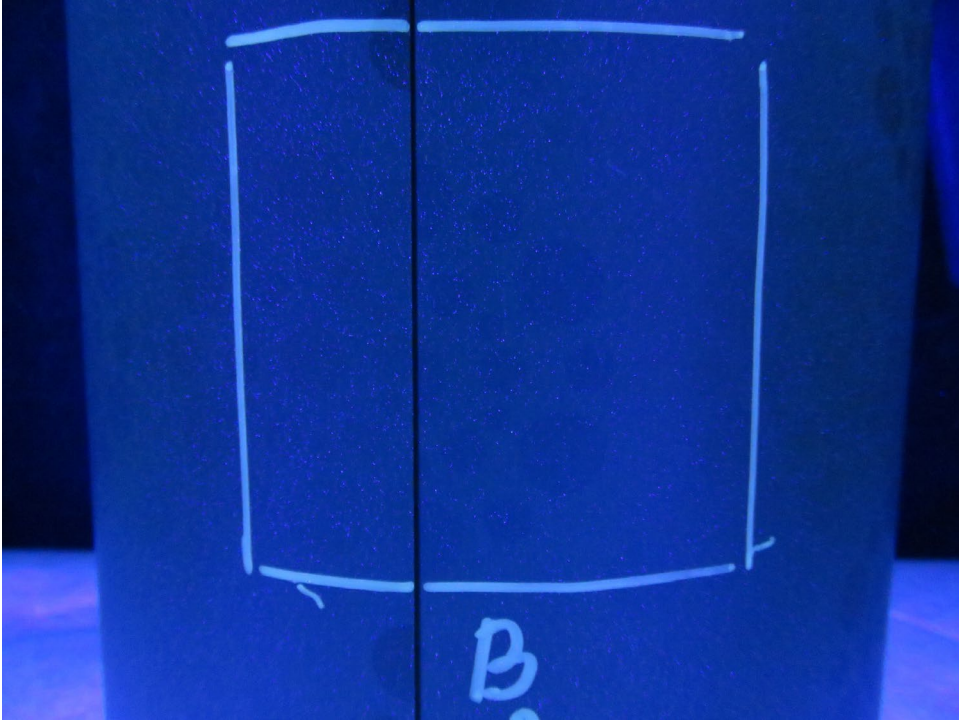

aerofog

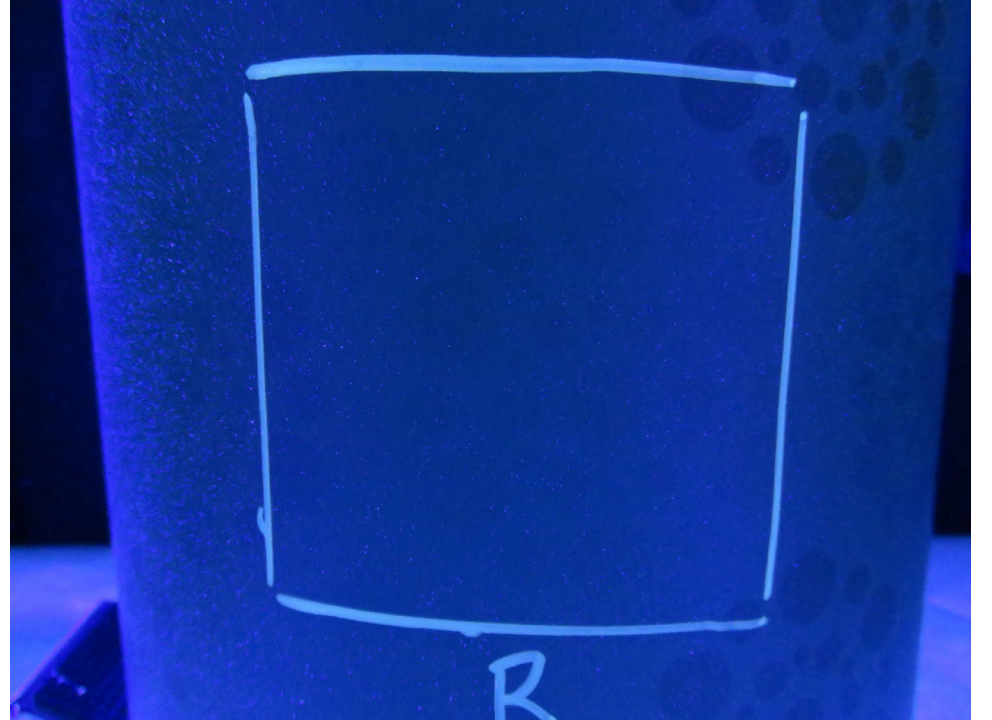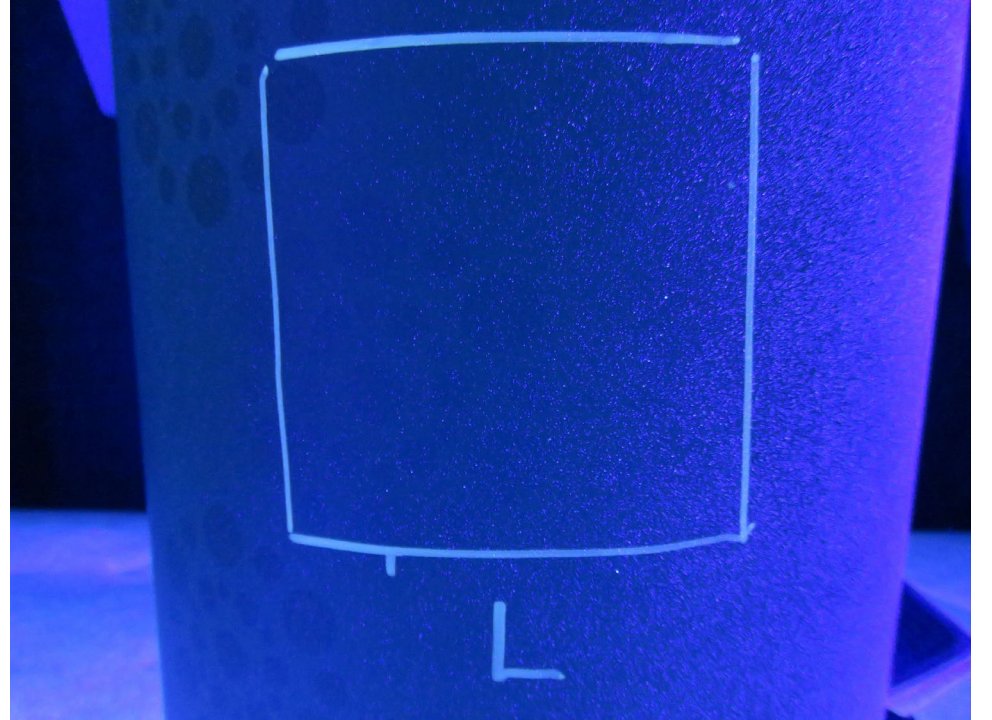



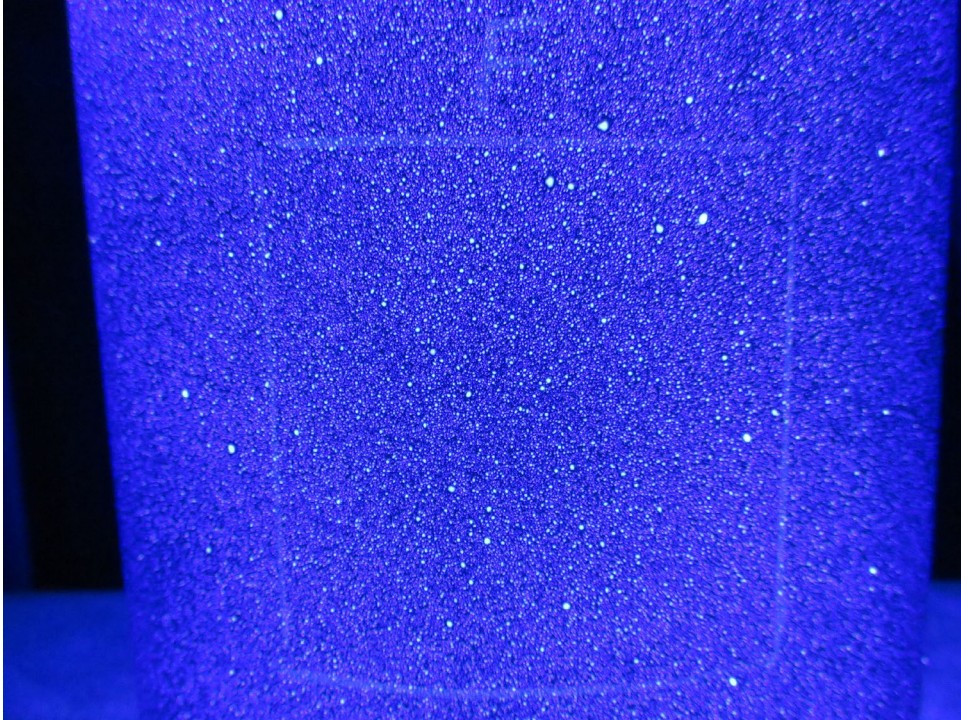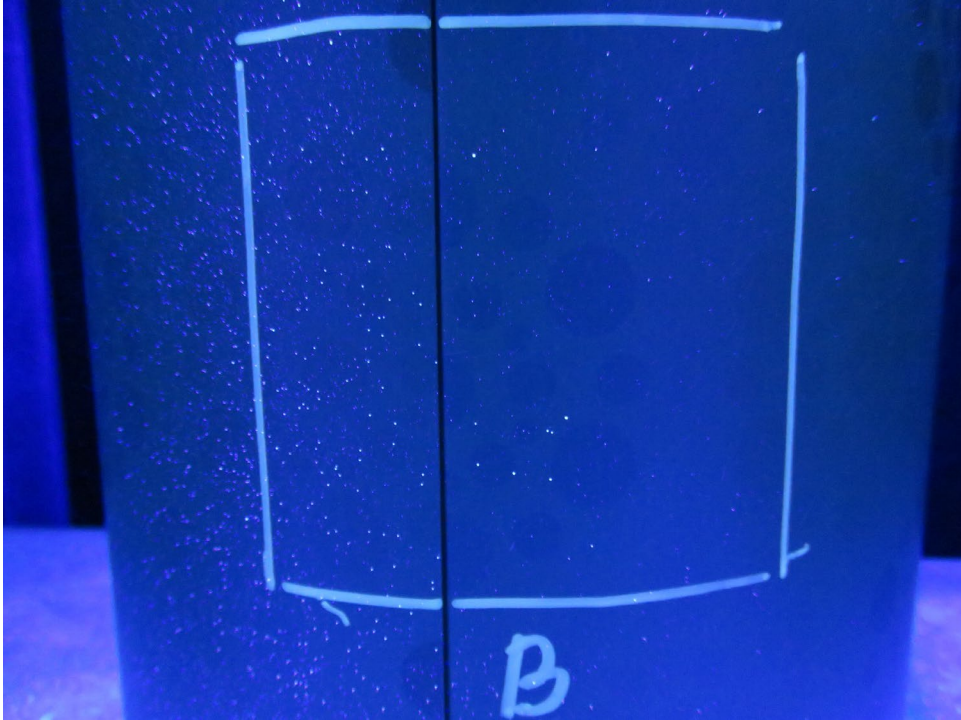

iphisius

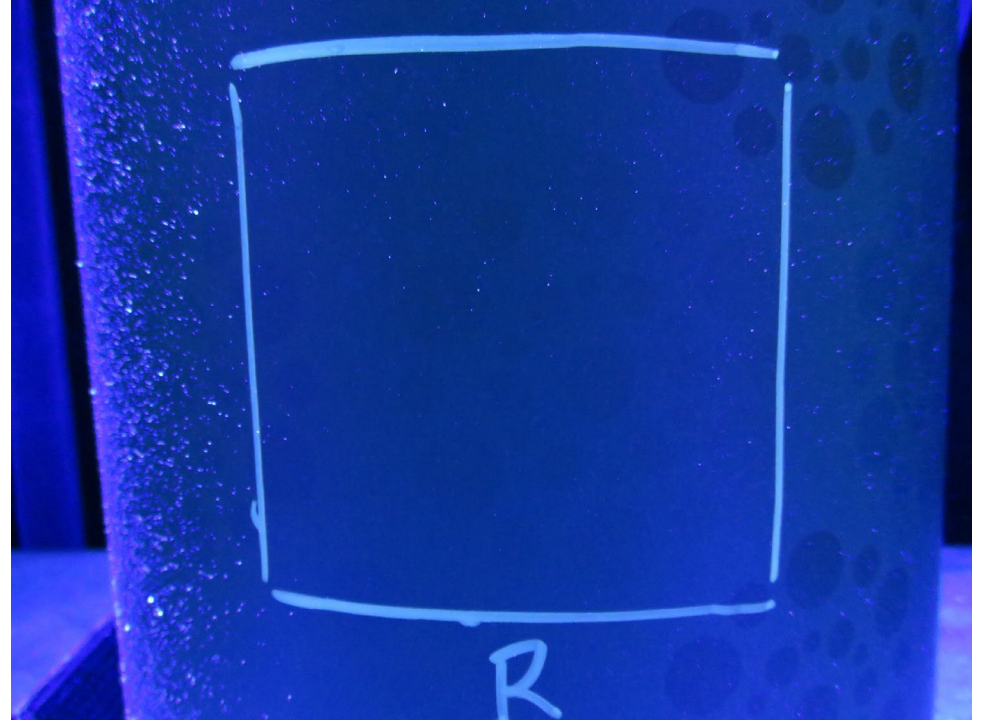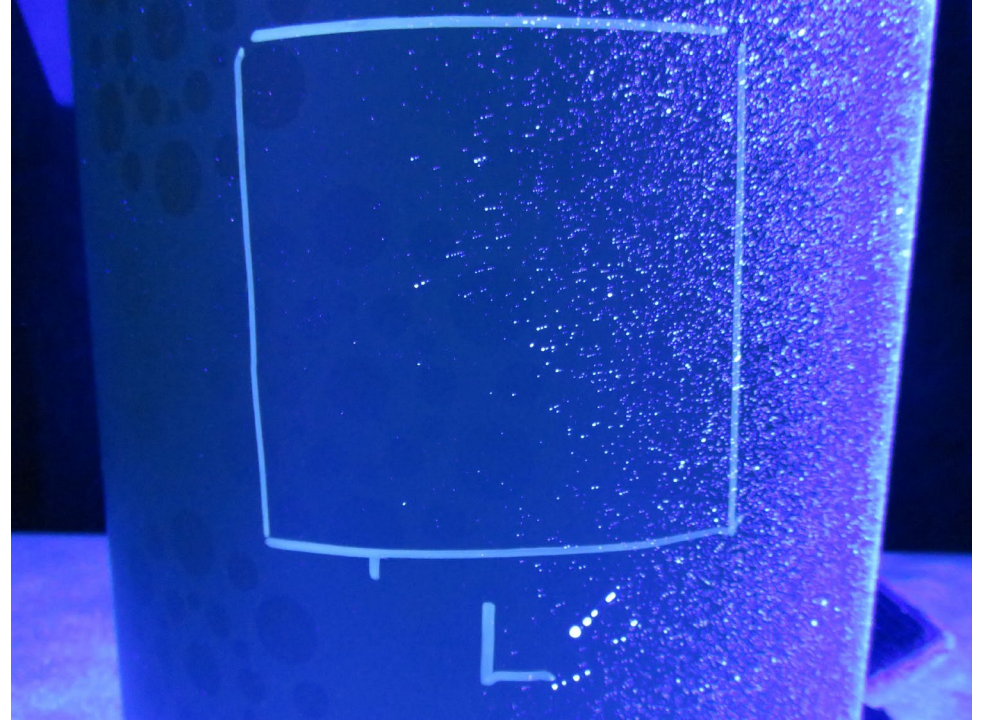

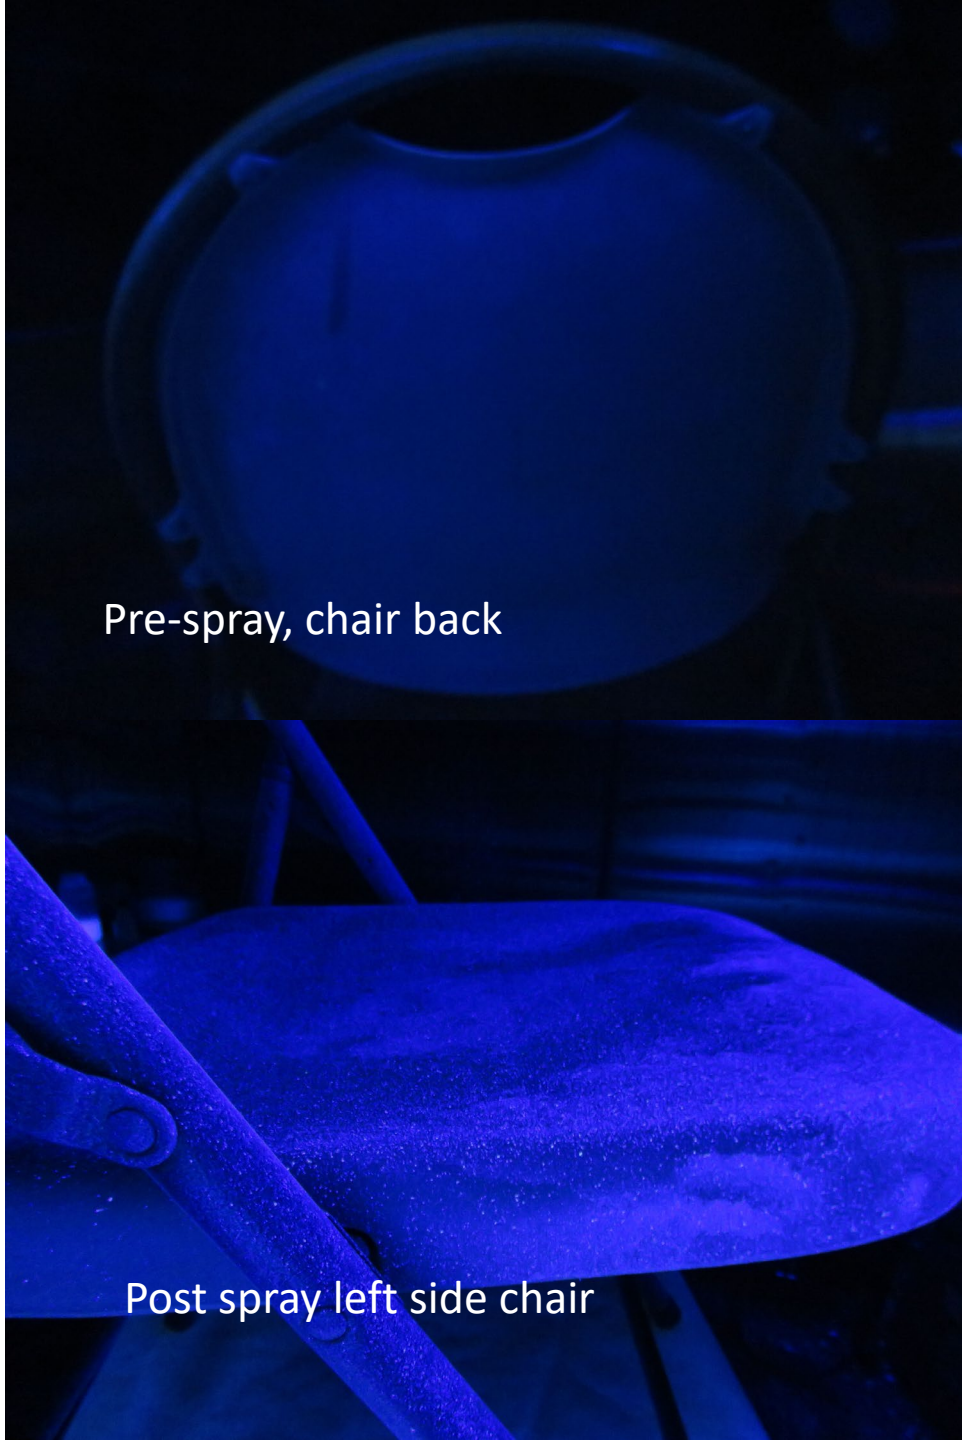

Pre-spray, chair back

Post spray left side chair

Clorox 360

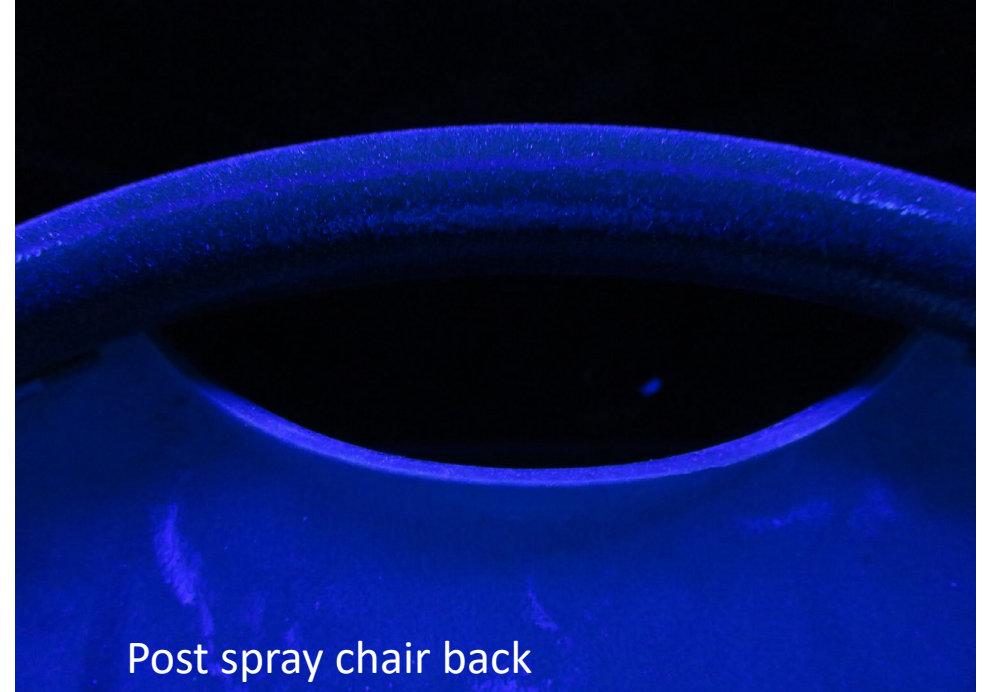

Post spray chair back

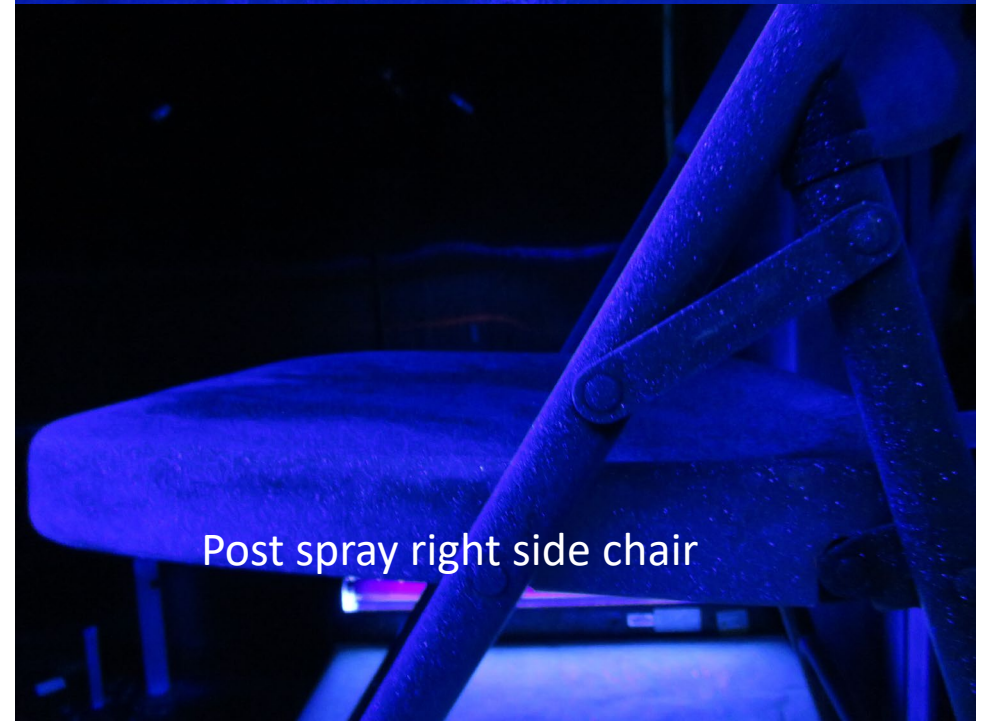

Post spray right side chair

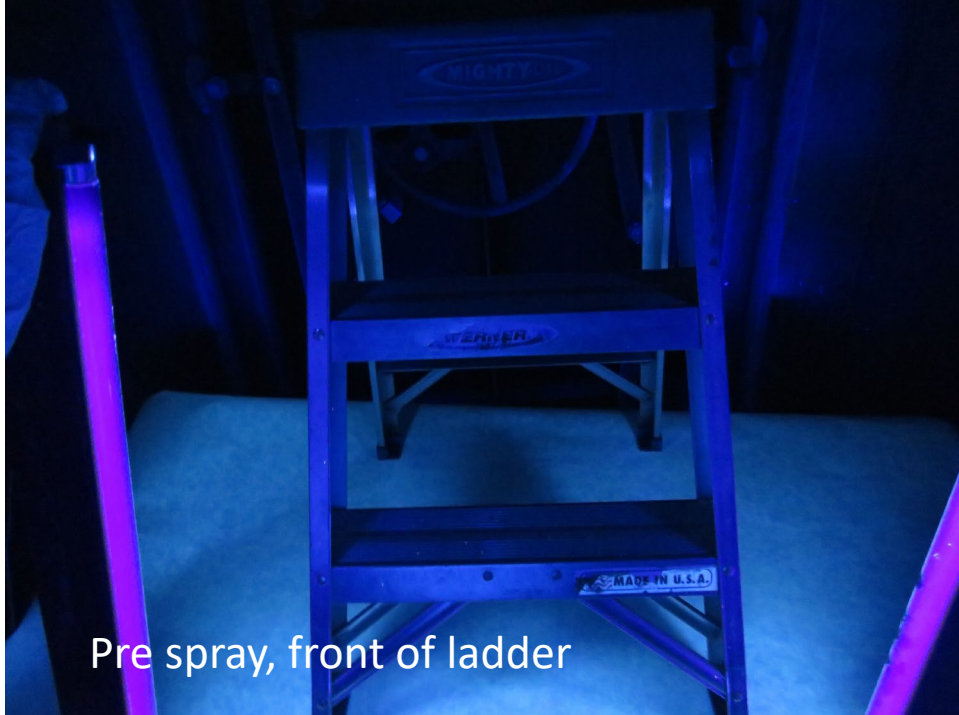

Pre spray, front of ladder

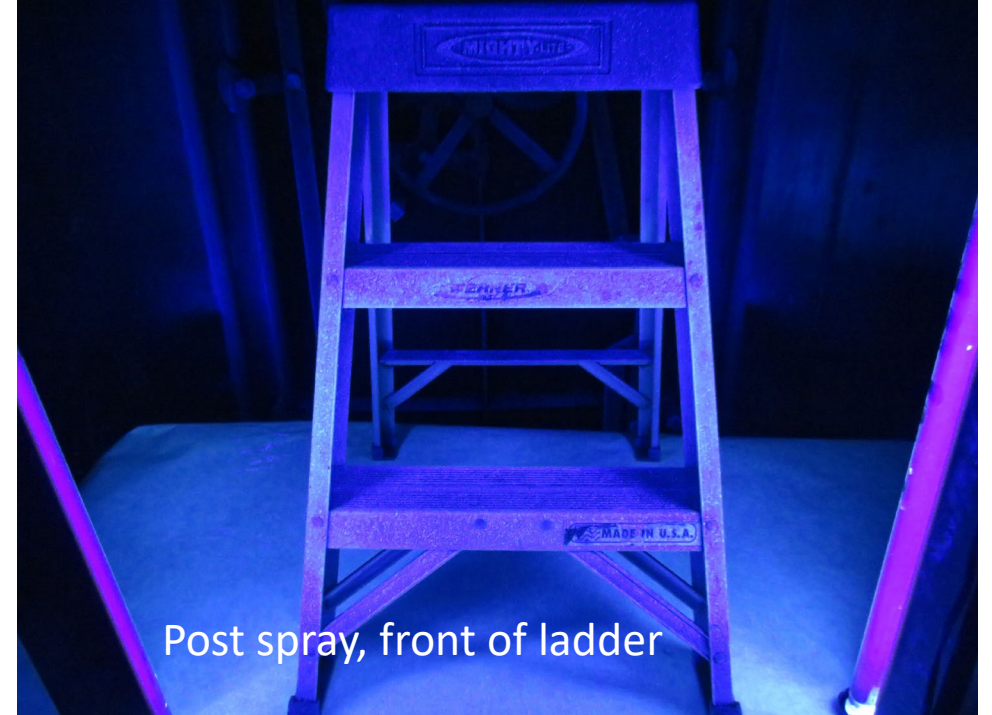

Post spray, front of ladder

Clorox 360

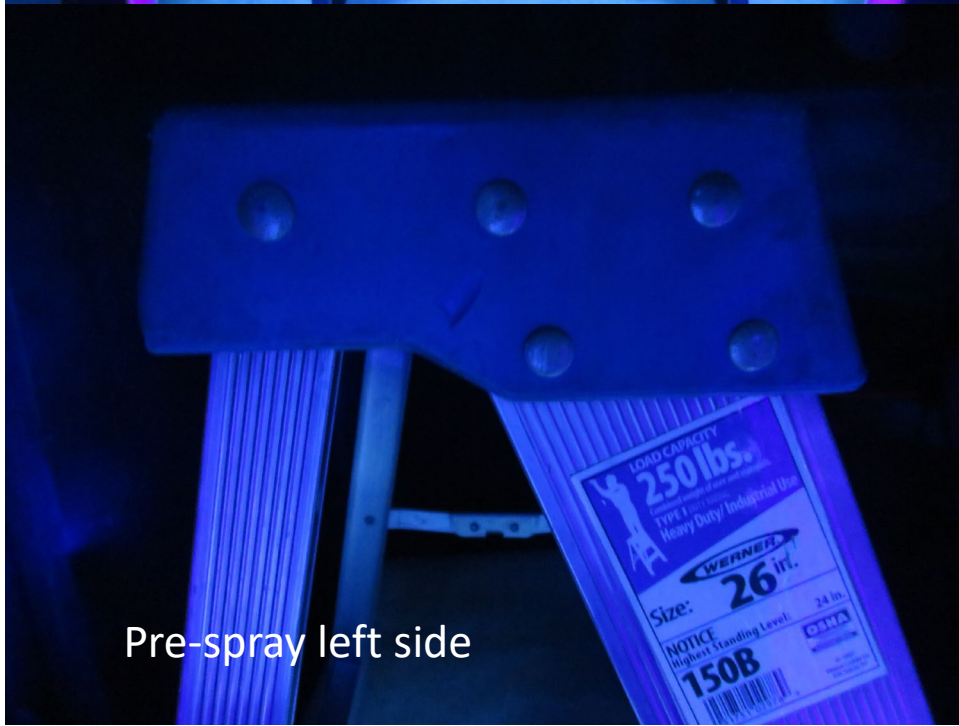

Pre-spray left side

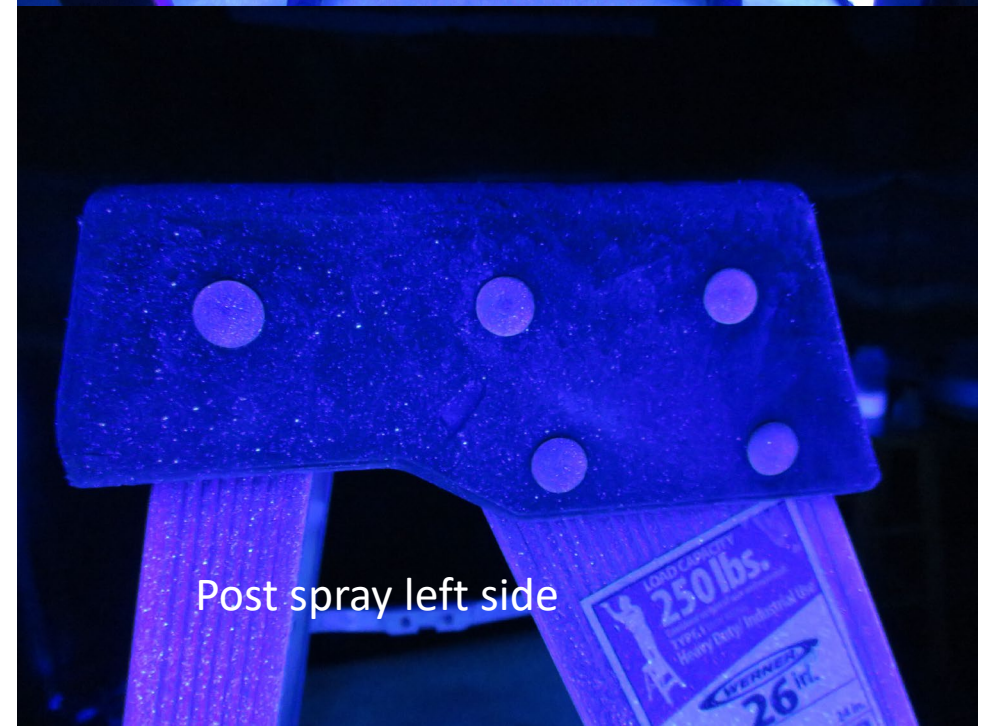

Post spray left side

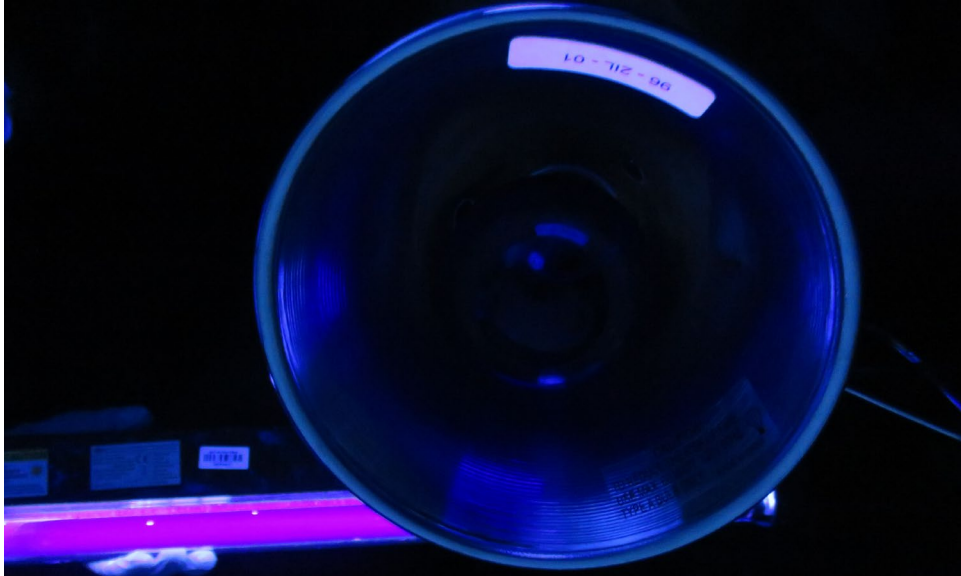

Pre-spray under lamp

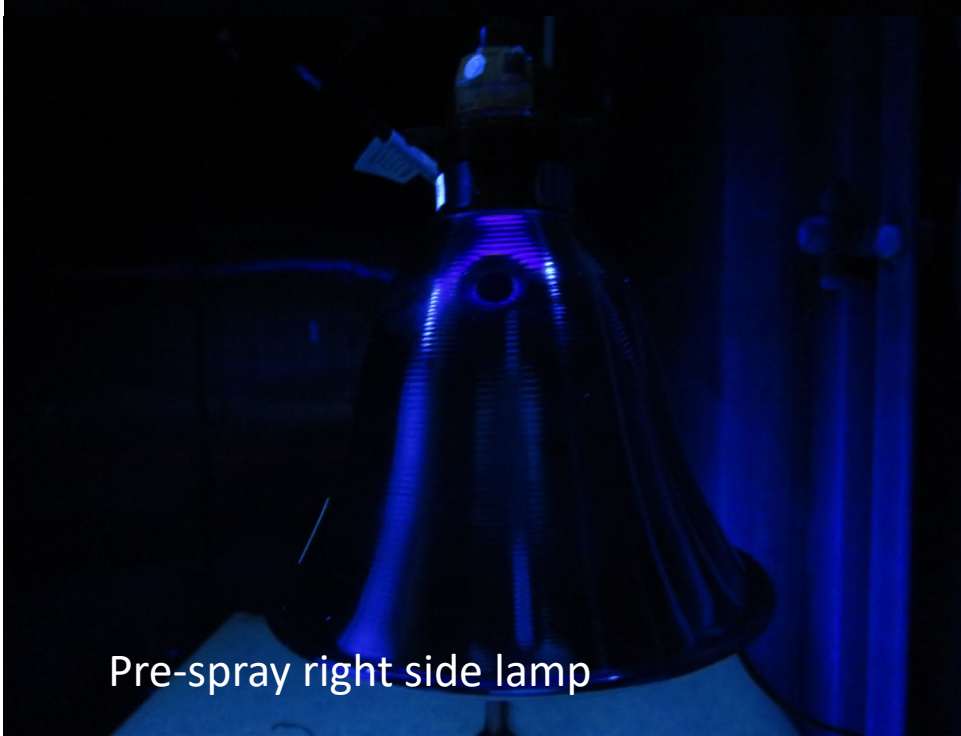

Pre-spray right side lamp

Clorox 360

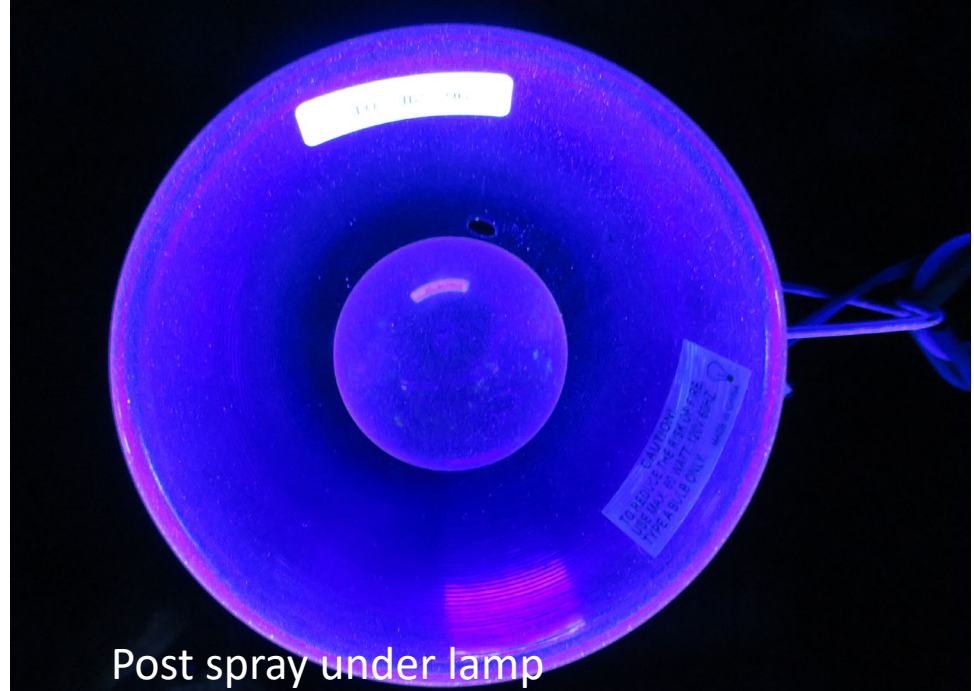

Post spray under lamp

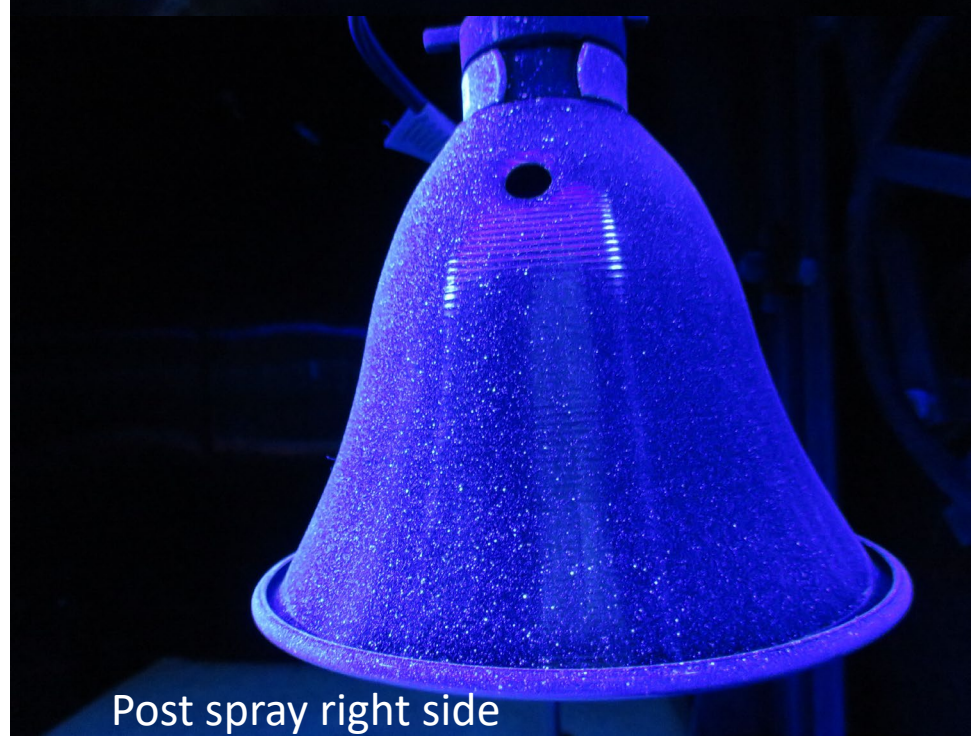

Post spray right side
